# Supplementary material for: Synthesis of β,β-diaryl propiophenones via palladium-catalyzed domino arylboronation, elimination and enone hydroarylation of enaminones
Source: Royal Society of Chemistry journal article supplement (doi:10.1039/c6ob01038e), 2016-01-01

# Synthesis of $\beta$ , $\beta$ -diaryl propiophenones via palladium-catalyzed domino arylboronation, elimination and enone hydroarylation of enaminones

Shanshan Zhong,<sup>a</sup> Yu Lu,<sup>a</sup> Yan Zhang,<sup>a</sup> Yunyun Liu<sup>a</sup> and Jie-Ping Wan<sup>a,\*</sup>

<sup>a</sup>College of Chemistry and Chemical Engineering, Jiangxi Normal University, Nanchang 330022, China. Email: wanjieping@jxnu.edu.cn

## Contents

|                                                                            |         |
|----------------------------------------------------------------------------|---------|
| General information.....                                                   | S1      |
| General procedure for the synthesis of ketones <b>3</b> and <b>5</b> ..... | S2      |
| Characterization data of all products.....                                 | S2-S9   |
| References.....                                                            | S9      |
| <sup>1</sup> H and <sup>13</sup> C NMR spectra of all products.....        | S10-S27 |
| X-Ray crystal structure of <b>3a</b> .....                                 | S28     |

### General information

All experiments were carried out under air atmosphere. All enaminones were synthesized following literature process,<sup>1</sup> and other chemicals and solvents used in the experiments were obtained from commercial sources and used directly without further treatment. <sup>1</sup>H and <sup>13</sup>C NMR spectra were recorded in 400 MHz apparatus. The frequencies for <sup>1</sup>H NMR and <sup>13</sup>C NMR test are 400 MHz and 100 MHz, respectively. The chemical shifts were reported in ppm with TMS as internal standard. Melting points were tested in X-4A instrument without correcting temperature and the HRMS were obtained under ESI model with TOF analyzer.

### General procedure for the synthesis of ketones 3

To a 25 mL round-bottom flask were added enaminone **1** (0.3 mmol), aryl boronic acid **2** (0.75 mmol), Pd(OAc)<sub>2</sub> (0.015 mol), bpy (0.03 mmol) and DMF/water (0.4 mL/1.6 mL). Then the mixture was heated up to 90 °C, and stirred at the same temperature for 12 h under (TLC). After cooling down to room temperature, 5 mL of water was added, and the resulting mixture was extracted with ethyl acetate (3 × 8 mL). The organic phases were collected and washed with small amount of water for three times. After drying with anhydrous Na<sub>2</sub>SO<sub>4</sub>, the solid was filtered and the acquired solution was subjected to reduced pressure to remove the solvent. The resulting residue was subjected to flash silica gel column chromatography to provide pure products with the elution of mixed petroleum ether/ethyl acetate (v/v = 20:1).

### Characterization data of all products

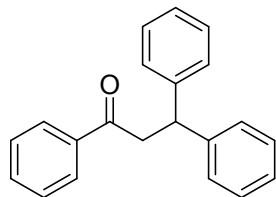

**1,3,3-Triphenylpropan-1-one (3a)**. Yield: 64 mg (75 %); white solid; m.p. 97-99 °C; <sup>1</sup>H NMR (400 MHz, CDCl<sub>3</sub>): δ 7.93 (d, 2 H, *J* = 7.6 Hz), 7.53 (t, 1 H, *J* = 7.2 Hz), 7.42 (t, 2 H, *J* = 7.6 Hz), 7.27-7.23 (m, 7 H), 7.18-7.15 (m, 3 H), 4.83 (t, 1 H, *J* = 7.2 Hz), 3.73(d, 2 H, *J* = 7.2 Hz); <sup>13</sup>C NMR (100 MHz, CDCl<sub>3</sub>): δ 198.0, 144.2, 137.1, 133.1, 128.6, 128.5, 128.1, 127.9, 126.4, 46.0, 44.7; ESI-HRMS: Calcd for C<sub>21</sub>H<sub>19</sub>O, [M+H]<sup>+</sup> 287.1430, found 287.1436.

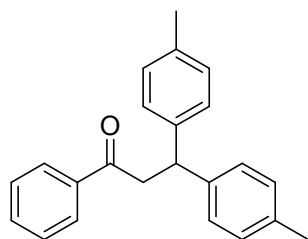

**1-Phenyl-3,3-di-*p*-tolylpropan-1-one (3b)**. Yield: 70 mg (74 %); white solid; m.p. 104-107 °C; <sup>1</sup>H NMR (400 MHz, CDCl<sub>3</sub>): δ 7.92 (d, 2 H, *J* = 7.6 Hz), 7.52 (t, 1 H, *J* =

6.8 Hz), 7.41 (t, 2 H,  $J = 7.2$  Hz), 7.14 (d, 4 H,  $J = 8.0$  Hz), 7.06 (d, 4 H,  $J = 7.6$  Hz), 4.74 (t, 1 H,  $J = 6.8$  Hz), 3.69 (d, 2 H,  $J = 7.2$  Hz), 2.26 (s, 6 H);  $^{13}\text{C}$  NMR (100 MHz,  $\text{CDCl}_3$ ):  $\delta$  198.2, 141.5, 137.2, 135.8, 133.0, 129.3, 128.6, 128.1, 127.7, 45.2, 44.9, 21.0; ESI-HRMS: Calcd for  $\text{C}_{23}\text{H}_{23}\text{O}$   $[\text{M}+\text{H}]^+$  315.1743, found 315.1728.

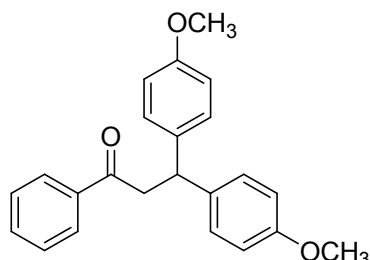

**3,3-Bis(4-methoxyphenyl)-1-phenylpropan-1-one (3c).** Yield: 75 mg (72 %); white solid; m.p. 109-111 °C;  $^1\text{H}$  NMR (400 MHz,  $\text{CDCl}_3$ ):  $\delta$  7.91 (d, 2 H,  $J = 8.4$  Hz), 7.51 (t, 1 H,  $J = 7.2$  Hz), 7.41 (t, 2 H,  $J = 7.6$  Hz), 7.15 (d, 4 H,  $J = 8.0$  Hz), 6.79 (d, 4 H,  $J = 8.4$  Hz), 4.72 (t, 1 H,  $J = 7.2$  Hz), 3.72 (s, 6 H), 3.66 (d, 2 H,  $J = 8.0$  Hz);  $^{13}\text{C}$  NMR (100 MHz,  $\text{CDCl}_3$ ):  $\delta$  198.3, 158.1, 137.2, 136.7, 133.0, 128.7, 128.6, 128.1, 114.0, 55.2, 45.2, 44.5; ESI-HRMS: Calcd for  $\text{C}_{23}\text{H}_{26}\text{NO}_3$   $[\text{M}+\text{NH}_4]^+$  364.1907, found 364.1906.

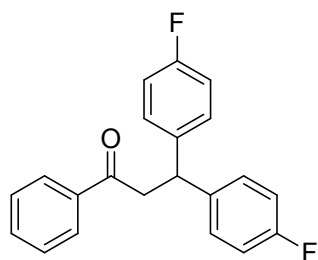

**3,3-Bis(4-fluorophenyl)-1-phenylpropan-1-one (3d).** Yield: 69 mg (71 %); white solid; m.p. 102-103 °C;  $^1\text{H}$  NMR (400 MHz,  $\text{CDCl}_3$ ):  $\delta$  7.92 (d, 2 H,  $J = 7.6$  Hz), 7.54 (t, 1 H,  $J = 7.6$  Hz), 7.42 (t, 2 H,  $J = 7.6$  Hz), 7.22-7.17 (m, 4 H), 6.94 (t, 4 H,  $J = 8.4$  Hz), 4.79 (t, 1 H,  $J = 6.8$  Hz), 3.68 (d, 2 H,  $J = 7.2$  Hz);  $^{13}\text{C}$  NMR (100 MHz,  $\text{CDCl}_3$ ):  $\delta$  197.7, 161.5 (d,  $J = 242.7$  Hz), 139.8 (d,  $J = 3.0$  Hz), 136.9, 133.3, 129.2 (d,  $J = 7.7$  Hz), 128.7, 128.1, 115.5 (d,  $J = 21.1$  Hz), 44.9, 44.4; ESI-HRMS: Calcd for  $\text{C}_{21}\text{H}_{17}\text{F}_2\text{O}$   $[\text{M}+\text{H}]^+$  323.1242, found 323.1232.

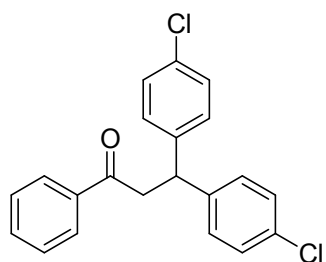

**3,3-Bis(4-chlorophenyl)-1-phenylpropan-1-one (3e).**<sup>4</sup> Yield: 74 mg (70 %); white solid; m.p. 123-125 °C; <sup>1</sup>H NMR (400 MHz, CDCl<sub>3</sub>): δ 7.92 (d, 2 H, *J* = 8.0 Hz), 7.56 (t, 1 H, *J* = 7.2 Hz), 7.44 (t, 2 H, *J* = 7.6 Hz), 7.24 (d, 4 H, *J* = 8.0 Hz), 7.16 (d, 4 H, *J* = 8.0 Hz), 4.78 (t, 1 H, *J* = 7.2 Hz), 3.86 (d, 2 H, *J* = 7.2 Hz); <sup>13</sup>C NMR (100 MHz, CDCl<sub>3</sub>): δ 197.3, 142.2, 136.8, 133.3, 132.4, 129.1, 128.8, 128.7, 128.0, 44.6, 44.4.

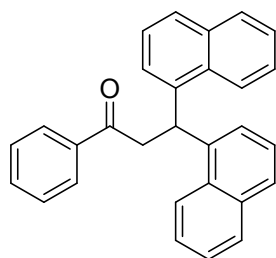

**3,3-Di(naphthalen-1-yl)-1-phenylpropan-1-one (3f).** Yield: 83 mg (72 %); white solid; m.p. 199-201 °C; <sup>1</sup>H NMR (400 MHz, CDCl<sub>3</sub>): δ 8.16 (d, 2 H, *J* = 8.0 Hz), 7.96 (d, 2 H, *J* = 8.0 Hz), 7.86 (d, 2 H, *J* = 8.0 Hz), 7.72 (d, 2 H, *J* = 8.0 Hz), 7.55 (t, 1 H, *J* = 7.2 Hz), 7.48-7.41 (m, 6 H), 7.30 (t, 2 H, *J* = 8.0 Hz), 7.19 (d, 2 H, *J* = 7.2 Hz), 6.46 (t, 1 H, *J* = 7.2 Hz), 3.92 (d, 2 H, *J* = 7.2 Hz); <sup>13</sup>C NMR (100 MHz, CDCl<sub>3</sub>): δ 197.8, 139.6, 137.0, 134.3, 133.3, 131.4, 129.0, 128.7, 128.1, 127.4, 126.5, 125.7, 125.4, 124.7, 123.5, 44.0, 37.1; ESI-HRMS: Calcd for C<sub>29</sub>H<sub>26</sub>NO [M+NH<sub>4</sub>]<sup>+</sup> 404.2009, found 404.2017.

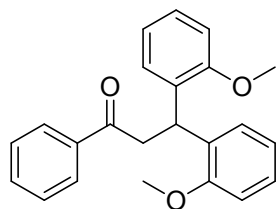

**3,3-Bis(2-methoxyphenyl)-1-phenylpropan-1-one (3g).** Yield: 65 mg (63 %); white solid; m.p. 119-121 °C; <sup>1</sup>H NMR (400 MHz, CDCl<sub>3</sub>): δ 7.96 (d, 2 H, *J* = 7.2 Hz), 7.52 (t, 1 H, *J* = 7.2 Hz), 7.41 (t, 2 H, *J* = 7.6 Hz), 7.19-7.10 (m, 4 H), 6.87-6.82 (m, 4 H),

5.43 (t, 1 H,  $J = 7.6$  Hz), 3.73 (s, 6 H), 3.68 (d, 2 H,  $J = 7.6$  Hz);  $^{13}\text{C}$  NMR (100 MHz,  $\text{CDCl}_3$ ):  $\delta$  198.9, 157.2, 137.3, 132.7, 131.9, 128.6, 128.5, 128.2, 127.3, 120.3, 110.9, 55.5, 42.9, 34.6; ESI-HRMS: Calcd for  $\text{C}_{23}\text{H}_{23}\text{O}_3$   $[\text{M}+\text{H}]^+$  347.1642, found 347.1632.

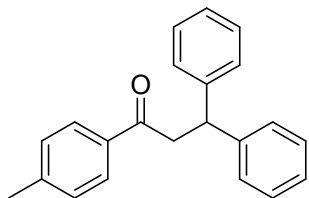

**3,3-Diphenyl-1-(p-tolyl)propan-1-one (3h).** Yield: 68 mg (75 %); white solid; m.p. 104-107 °C;  $^1\text{H}$  NMR (400 MHz,  $\text{CDCl}_3$ ):  $\delta$  7.82 (d, 2 H,  $J = 7.6$  Hz), 7.26-7.25 (m, 8 H), 7.22-7.20 (m, 2 H), 7.17-7.14 (m, 2 H), 4.82 (t, 1 H,  $J = 7.6$  Hz), 3.70 (d, 2 H,  $J = 7.2$  Hz), 2.37 (s, 3 H);  $^{13}\text{C}$  NMR (100 MHz,  $\text{CDCl}_3$ ):  $\delta$  197.6, 144.3, 143.9, 134.7, 129.3, 128.6, 128.2, 127.9, 126.4, 46.1, 44.7, 21.6; ESI-HRMS: Calcd for  $\text{C}_{22}\text{H}_{21}\text{O}$   $[\text{M}+\text{H}]^+$  301.1587, found 301.1593.

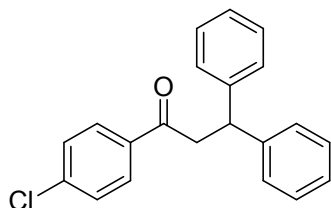

**1-(4-Chlorophenyl)-3,3-diphenylpropan-1-one (3i).** Yield: 70 mg (73 %); white solid; m.p. 131-135 °C;  $^1\text{H}$  NMR (400 MHz,  $\text{CDCl}_3$ ):  $\delta$  7.83 (d, 2 H,  $J = 8.0$  Hz), 7.38 (d, 2 H,  $J = 8.0$  Hz), 7.28-7.22 (m, 8 H), 7.17-7.14 (m, 2 H), 4.79 (t, 1 H,  $J = 7.2$  Hz), 3.68 (d, 2 H,  $J = 7.2$  Hz);  $^{13}\text{C}$  NMR (100 MHz,  $\text{CDCl}_3$ ):  $\delta$  196.9, 144.0, 139.6, 135.4, 129.6, 129.0, 128.7, 127.9, 126.6, 46.1, 44.7; ESI-HRMS: Calcd for  $\text{C}_{21}\text{H}_{18}\text{ClO}$   $[\text{M}+\text{H}]^+$  321.1041, found 321.1038.

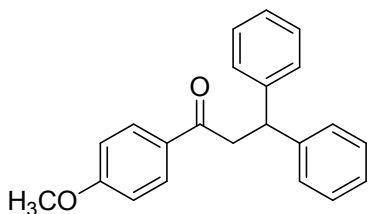

**1-(4-Methoxyphenyl)-3,3-diphenylpropan-1-one (3j).** Yield: 66 mg (70 %); white solid; m.p. 115-118 °C;  $^1\text{H}$  NMR (400 MHz,  $\text{CDCl}_3$ ):  $\delta$  7.88 (d, 2 H,  $J = 8.4$  Hz), 7.25-7.19 (m, 8 H), 7.11 (t, 2 H,  $J = 6.4$  Hz), 6.83 (d, 2 H,  $J = 8.8$  Hz), 4.81 (t, 1 H,  $J$

= 7.6 Hz), 3.72 (s, 3 H), 3.64 (d, 2 H,  $J = 7.2$  Hz);  $^{13}\text{C}$  NMR (100 MHz,  $\text{CDCl}_3$ ):  $\delta$  196.6, 163.6, 144.5, 130.5, 130.2, 128.7, 128.0, 126.5, 113.9, 55.5, 46.2, 44.4; ESI-HRMS: Calcd for  $\text{C}_{22}\text{H}_{21}\text{O}_2$   $[\text{M}+\text{H}]^+$  317.1536, found 317.1537.

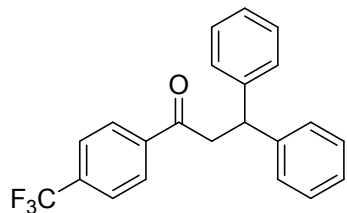

**3,3-Diphenyl-1-(4-(trifluoromethyl)phenyl)propan-1-one (3k).** Yield: 73 mg (69 %); white solid; m.p. 119-121 °C;  $^1\text{H}$  NMR (400 MHz,  $\text{CDCl}_3$ ):  $\delta$  8.00 (d, 2 H,  $J = 8.4$  Hz), 7.69 (d, 2 H,  $J = 8.4$  Hz), 7.30-7.25 (m, 8 H), 7.20-7.16 (m, 2 H), 4.81 (t, 1 H,  $J = 7.2$  Hz), 3.75 (d, 2 H,  $J = 7.6$  Hz);  $^{13}\text{C}$  NMR (100 MHz,  $\text{CDCl}_3$ ):  $\delta$  197.2, 143.8, 139.8, 134.4 (q,  $J = 31.9$  Hz), 128.7, 128.4, 127.8, 126.6, 125.7 (q,  $J = 3.6$  Hz), 123.7 (d,  $J = 271.1$  Hz), 46.1, 45.1; ESI-HRMS: Calcd for  $\text{C}_{22}\text{H}_{21}\text{F}_3\text{NO}$   $[\text{M}+\text{NH}_4]^+$  372.1570, found 372.1575.

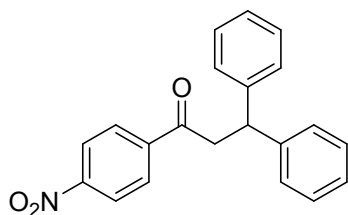

**1-(4-Nitrophenyl)-3,3-diphenylpropan-1-one (3l).**<sup>2</sup> Yield: 71 mg (71 %); white solid; m.p. 145-148 °C;  $^1\text{H}$  NMR (400 MHz,  $\text{CDCl}_3$ ):  $\delta$  8.26 (d, 2 H,  $J = 8.8$  Hz), 8.03 (d, 2 H,  $J = 8.8$  Hz), 7.30-7.24 (m, 8 H), 7.20-7.17 (m, 2 H), 4.79 (t, 1 H,  $J = 7.2$  Hz), 3.76 (d, 2 H,  $J = 7.2$  Hz);  $^{13}\text{C}$  NMR (100 MHz,  $\text{CDCl}_3$ ):  $\delta$  196.8, 150.3, 143.5, 141.5, 129.1, 128.7, 127.8, 126.7, 123.9, 46.1, 45.3.

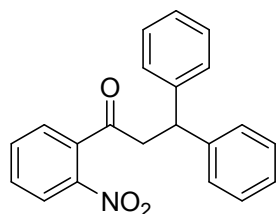

**1-(2-Nitrophenyl)-3,3-diphenylpropan-1-one (3m).** Yield: 65 mg (65 %); white solid; m.p. 129-131 °C;  $^1\text{H}$  NMR (400 MHz,  $\text{CDCl}_3$ ):  $\delta$  8.71 (s, 1 H), 8.36 (d, 1 H,  $J =$

8.0 Hz), 8.21 (d, 1 H,  $J = 7.6$  Hz), 7.60 (t, 1 H,  $J = 8.0$  Hz), 7.27 (d, 8 H,  $J = 4.4$  Hz), 7.20-7.15 (m, 2 H), 4.82 (t, 1 H,  $J = 7.2$  Hz), 3.79 (d, 2 H,  $J = 7.6$  Hz);  $^{13}\text{C}$  NMR (100 MHz,  $\text{CDCl}_3$ ):  $\delta$  196.0, 148.4, 143.6, 138.2, 133.7, 130.0, 128.7, 127.8, 127.4, 126.7, 123.0, 46.0, 45.0; ESI-HRMS: Calcd for  $\text{C}_{21}\text{H}_{21}\text{N}_2\text{O}_3$   $[\text{M}+\text{NH}_4]^+$  349.1547, found 349.1558.

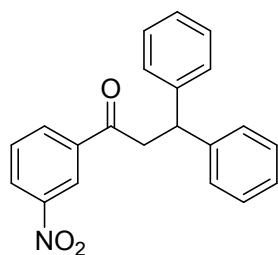

**1-(3-Nitrophenyl)-3,3-diphenylpropan-1-one (3n).** Yield: 67 mg (68 %); white solid; m.p. 129-131 °C;  $^1\text{H}$  NMR (400 MHz,  $\text{CDCl}_3$ ):  $\delta$  8.71 (s, 1 H), 8.38 (d, 1 H,  $J = 8.4$  Hz), 8.22 (d, 1 H,  $J = 7.6$  Hz), 7.62 (t, 1 H,  $J = 8.0$  Hz), 7.28 (d, 8 H,  $J = 4.4$  Hz), 7.20-7.16 (m, 2 H), 4.82 (t, 1 H,  $J = 7.2$  Hz), 3.78 (d, 2 H,  $J = 7.6$  Hz);  $^{13}\text{C}$  NMR (100 MHz,  $\text{CDCl}_3$ ):  $\delta$  196.0, 148.4, 143.6, 138.2, 133.6, 129.9, 128.7, 127.8, 127.4, 126.7, 123.0, 46.0, 44.9; ESI-HRMS: Calcd for  $\text{C}_{21}\text{H}_{21}\text{N}_2\text{O}_3$   $[\text{M}+\text{NH}_4]^+$  349.1547, found 349.1552.

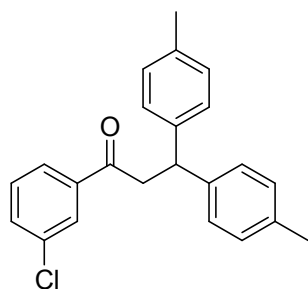

**1-(3-Chlorophenyl)-3,3-di-p-tolylpropan-1-one (3o).** Yield: 71 mg (68 %); white solid; m.p. 87-89 °C;  $^1\text{H}$  NMR (400 MHz,  $\text{CDCl}_3$ ):  $\delta$  7.87 (s, 1 H), 7.79 (d, 1 H,  $J = 8.0$  Hz), 7.51 (d, 1 H,  $J = 7.6$  Hz), 7.37 (t, 1 H,  $J = 8.0$  Hz), 7.13 (d, 4 H,  $J = 7.6$  Hz), 7.07 (d, 4 H,  $J = 7.6$  Hz), 4.72 (t, 1 H,  $J = 7.6$  Hz), 3.66 (d, 2 H,  $J = 7.2$  Hz), 2.28 (s, 6 H);  $^{13}\text{C}$  NMR (100 MHz,  $\text{CDCl}_3$ ):  $\delta$  197.0, 141.1, 138.6, 136.0, 134.9, 133.0, 130.0, 129.3, 128.3, 127.6, 126.2, 45.2, 45.0, 21.0; ESI-HRMS: Calcd for  $\text{C}_{23}\text{H}_{25}\text{ClNO}$   $[\text{M}+\text{NH}_4]^+$  366.1619, found 366.1623.

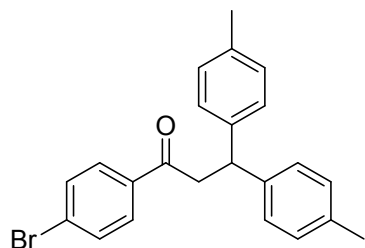

**1-(4-Bromophenyl)-3,3-di-p-tolylpropan-1-one (3p).** Yield: 81 mg (69 %); white solid; m.p. 110-114 °C; <sup>1</sup>H NMR (400 MHz, CDCl<sub>3</sub>): δ 7.78 (d, 2 H, *J* = 8.8 Hz), 7.57 (d, 2 H, *J* = 8.8 Hz), 7.13 (d, 4 H, *J* = 8.0 Hz), 7.06 (d, 4 H, *J* = 8.0 Hz), 4.71 (t, 1 H, *J* = 7.2 Hz), 3.65 (d, 2 H, *J* = 7.2 Hz), 2.28 (s, 6 H); <sup>13</sup>C NMR (100 MHz, CDCl<sub>3</sub>): δ 197.3, 141.2, 136.0, 135.8, 131.9, 129.7, 129.3, 128.3, 127.6, 45.2, 44.8, 21.1; ESI-HRMS: Calcd for C<sub>23</sub>H<sub>25</sub>BrNO [M+NH<sub>4</sub>]<sup>+</sup> 410.1114, found 410.1098.

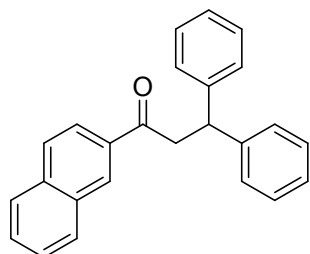

**1-(Naphthalen-2-yl)-3,3-diphenylpropan-1-one (3q).**<sup>3</sup> Yield: 72 mg (71 %); white solid; m.p. 103-105 °C; <sup>1</sup>H NMR (400 MHz, CDCl<sub>3</sub>): δ 8.46 (d, 1 H, *J* = 9.6 Hz), 8.00-7.97 (m, 1 H), 7.93 (d, 1 H, *J* = 8.0 Hz), 7.86 (d, 2 H, *J* = 8.4 Hz), 7.60-7.53 (m, 2 H), 7.32-7.25 (m, 8 H), 7.19-7.15 (m, 2 H), 4.89 (t, 1 H, *J* = 7.2 Hz), 3.87 (d, 2 H, *J* = 7.2 Hz); <sup>13</sup>C NMR (100 MHz, CDCl<sub>3</sub>): δ 198.0, 144.3, 135.6, 134.5, 132.6, 129.8, 129.6, 128.7, 128.6, 128.5, 128.0, 127.9, 126.9, 126.5, 124.0, 46.2, 44.9.

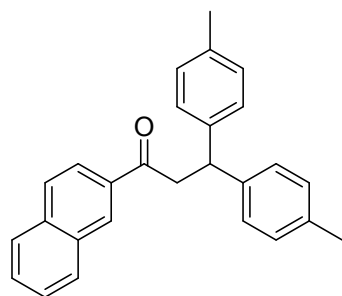

**1-(Naphthalen-2-yl)-3,3-di-p-tolylpropan-1-one (3r).** Yield: 78 mg (71 %); white solid; m.p. 134-137 °C; <sup>1</sup>H NMR (400 MHz, CDCl<sub>3</sub>): δ 8.44 (s, 1 H), 7.98 (d, 1 H, *J* = 8.8 Hz), 7.92 (d, 1 H, *J* = 8.0 Hz), 7.85 (d, 2 H, *J* = 8.4 Hz), 7.60-7.51 (m, 2 H), 7.17



(d, 4 H,  $J = 7.6$  Hz), 7.07 (d, 4 H,  $J = 7.6$  Hz), 4.80 (t, 1 H,  $J = 7.2$  Hz), 3.82 (d, 2 H,  $J = 7.2$  Hz), 2.27 (s, 6 H);  $^{13}\text{C}$  NMR (100 MHz,  $\text{CDCl}_3$ ):  $\delta$  198.2, 141.5, 135.9, 135.6, 134.5, 132.6, 129.8, 129.6, 129.3, 128.5, 127.8, 127.7, 126.8, 124.0, 45.4, 45.0, 21.0; ESI-HRMS: Calcd for  $\text{C}_{27}\text{H}_{25}\text{O}$   $[\text{M}+\text{H}]^+$  365.1900, found 365.1892.

## References

1. El-Taweel, F. M. A. A.; Elnagdi, M. H. *J. Heterocyclic Chem.* 2001, **38**, 981.
2. Yang, C. F.; Shen, C.; Li, H. H.; Tian, S. K. *Chin. Sci. Bull.* **2012**, *57*, 2377.
3. Zhu, X.; Wang, Y.-F.; Ren, W.; Zhang, F.-L.; Chiba, S. *Org. Lett.* **2013**, *15*, 3214.
4. Naveen, N.; Koppolu, S.R.; Balamurugan, R. *Adv. Synth. Catal.* **2015**, *357*, 1463.

# $^1\text{H}$ and $^{13}\text{C}$ NMR spectra of all products

## 3a

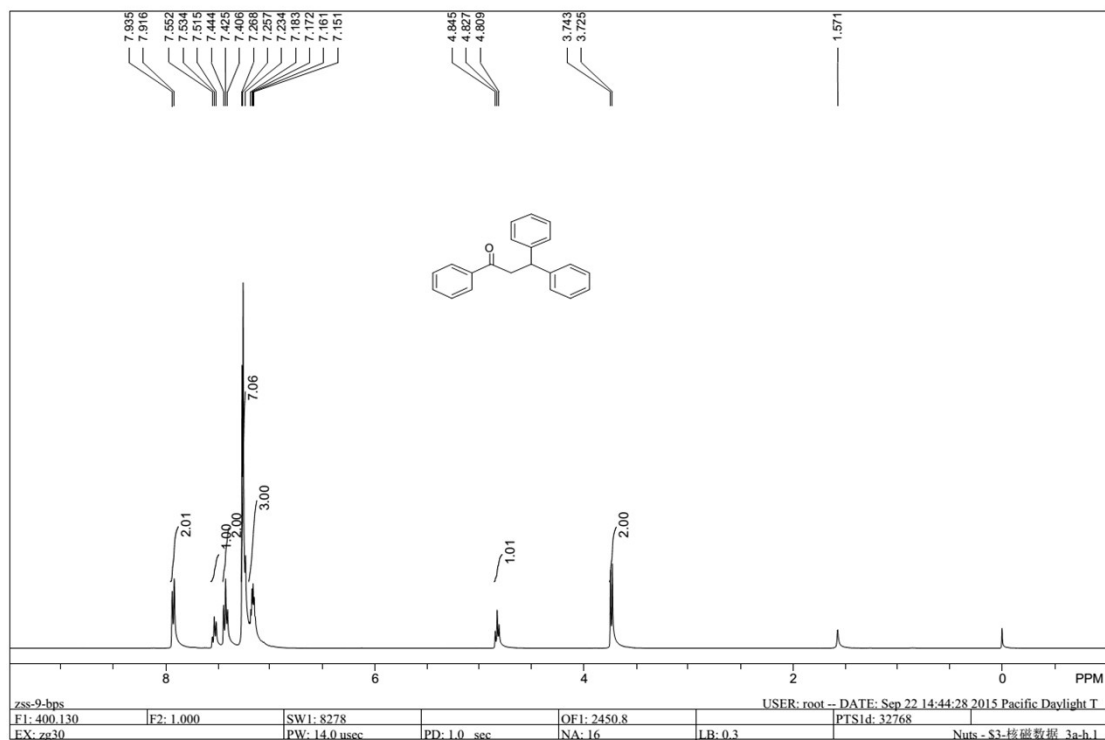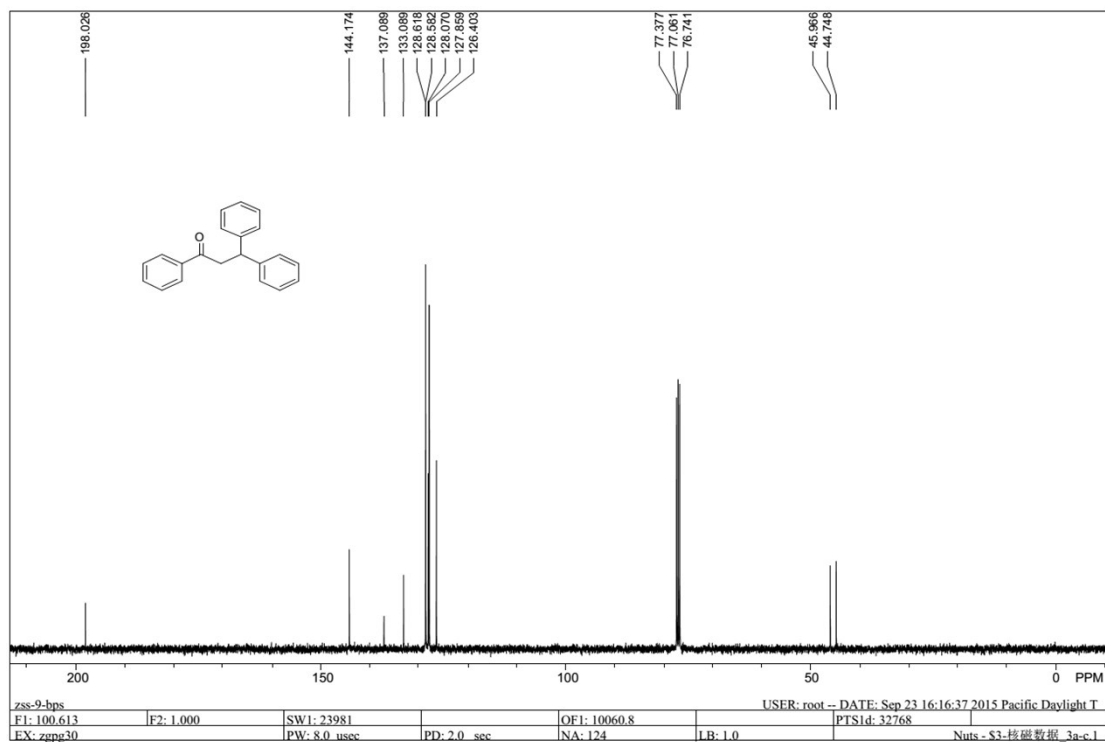

3b

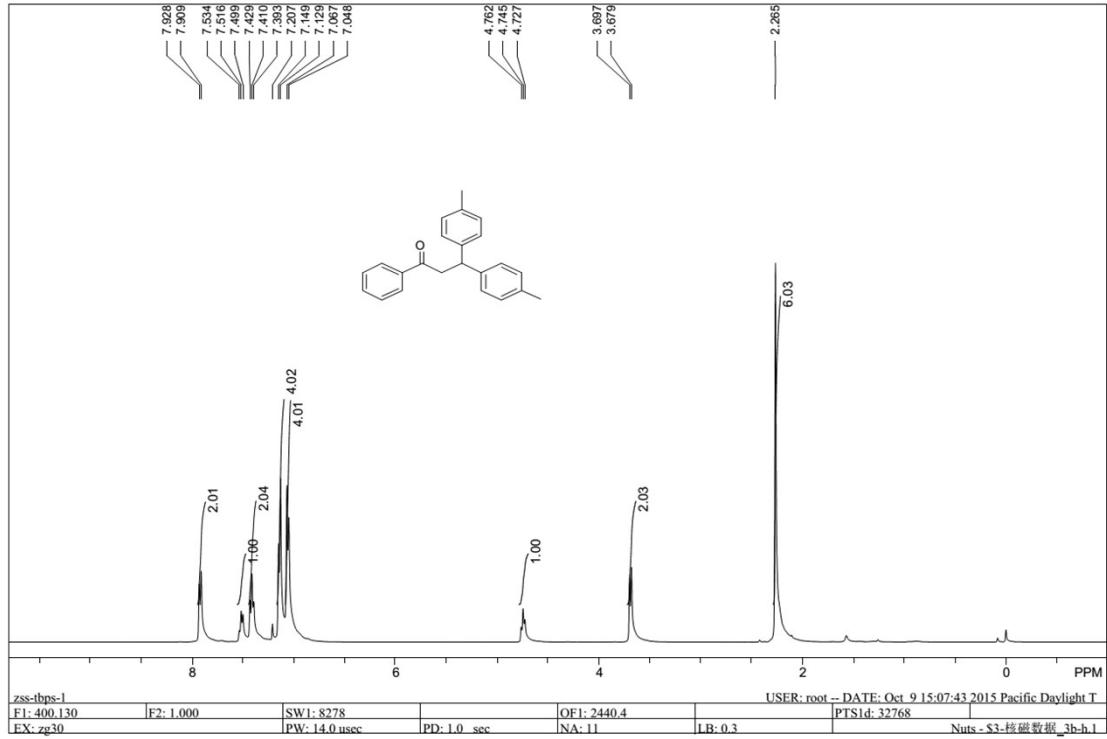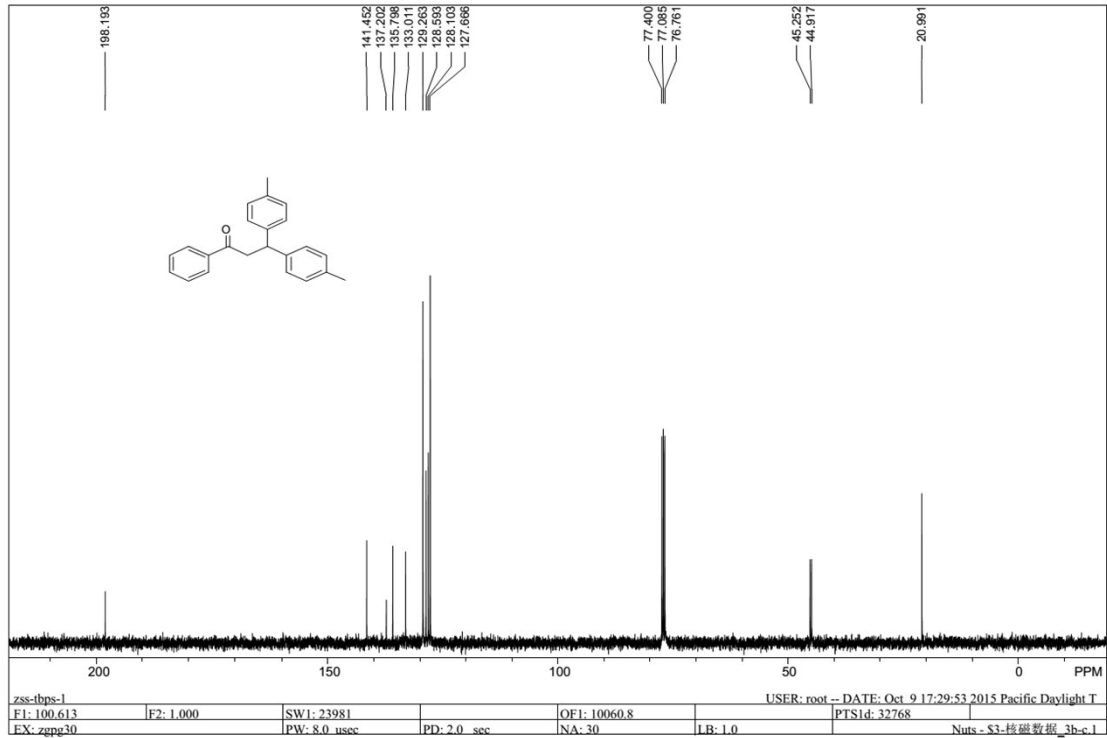

3c

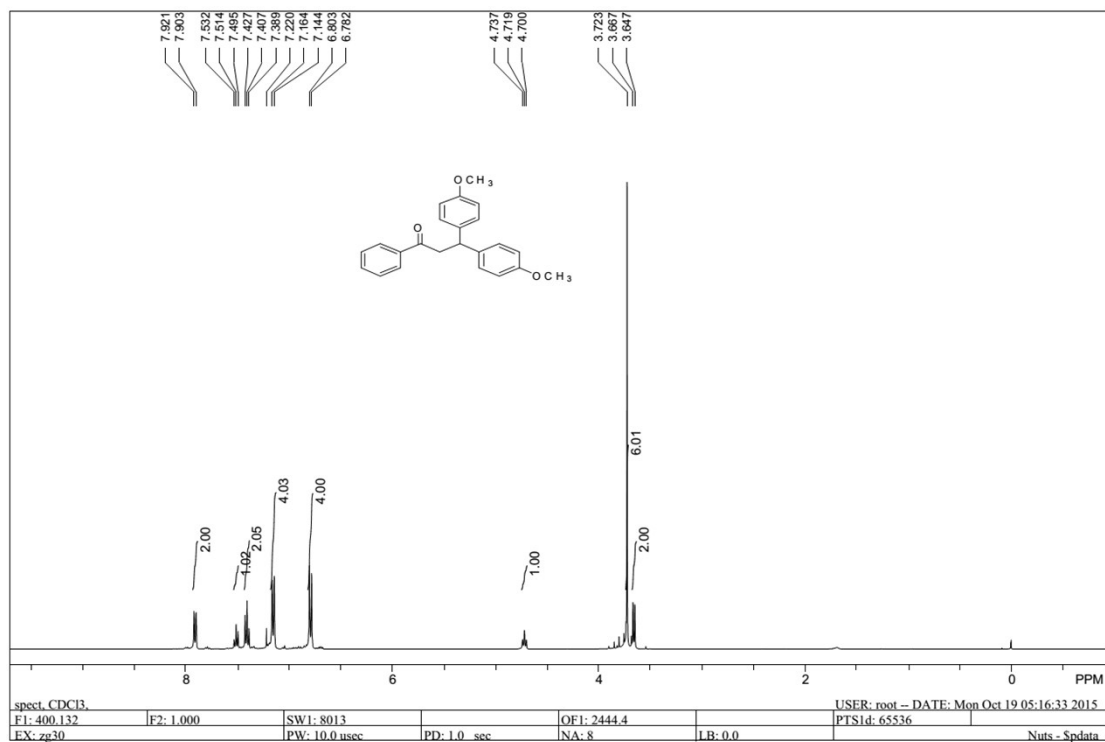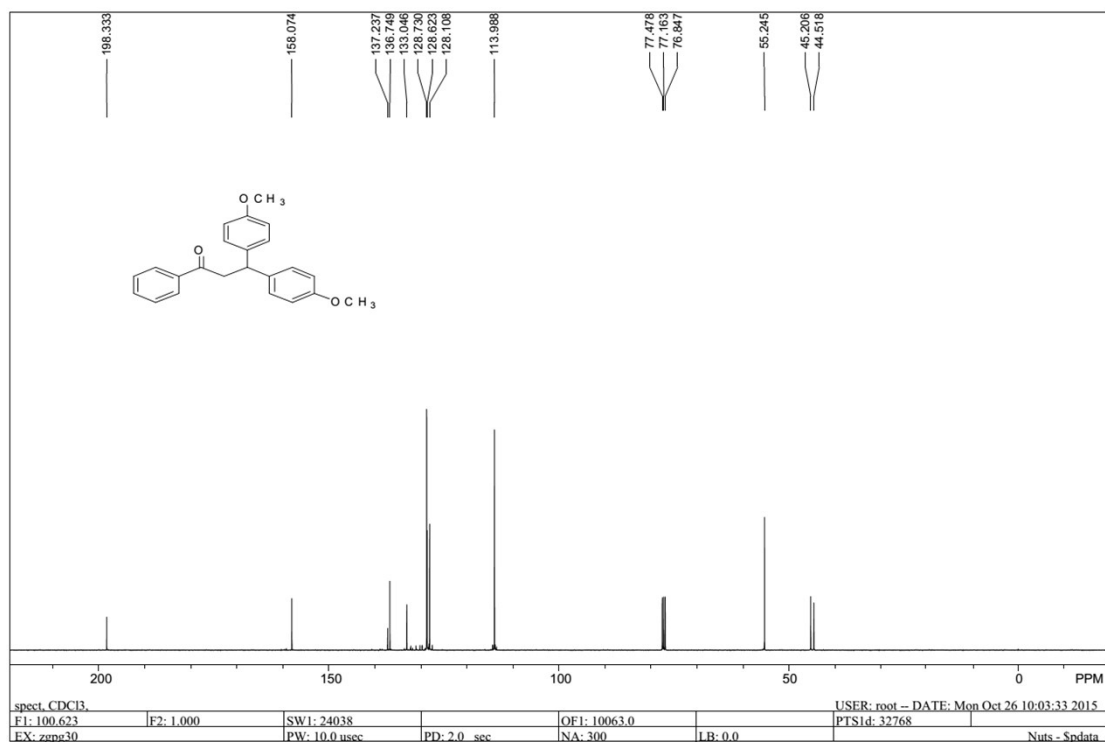

3d

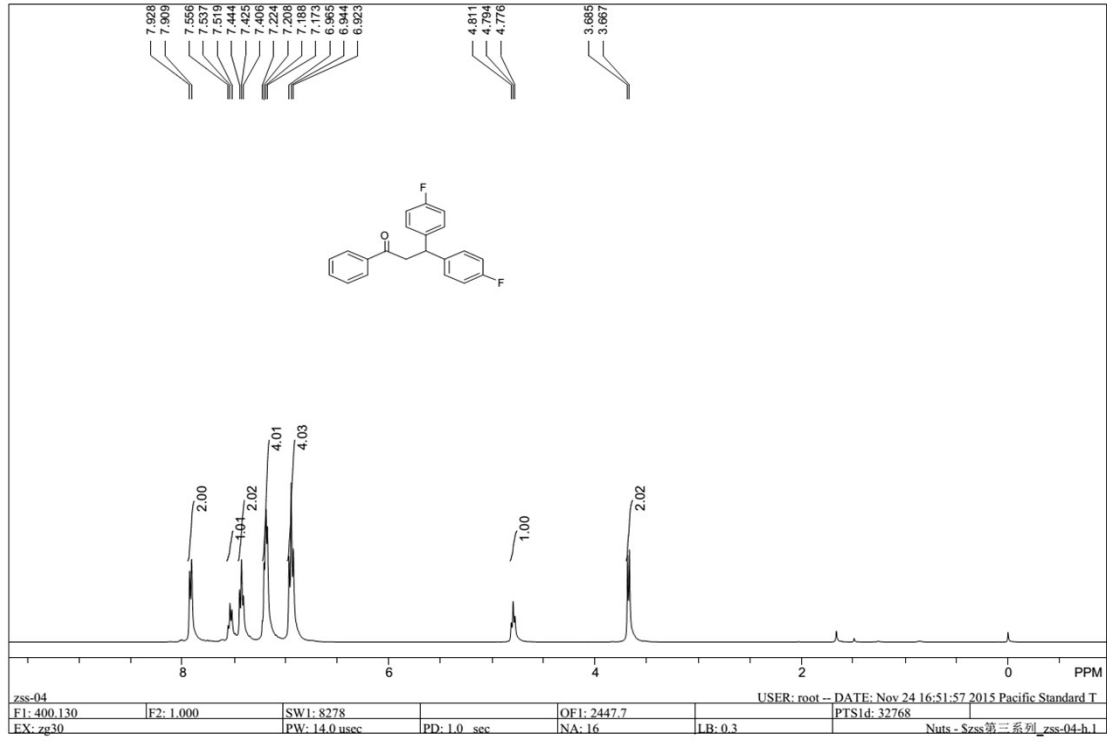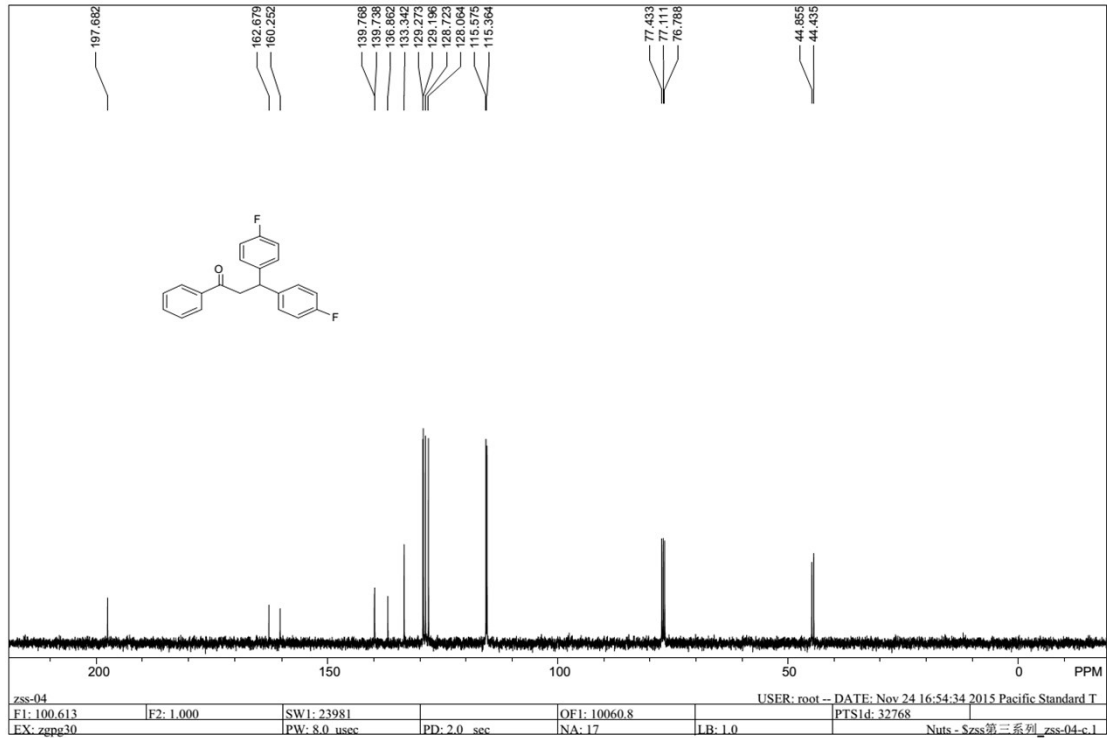

3e

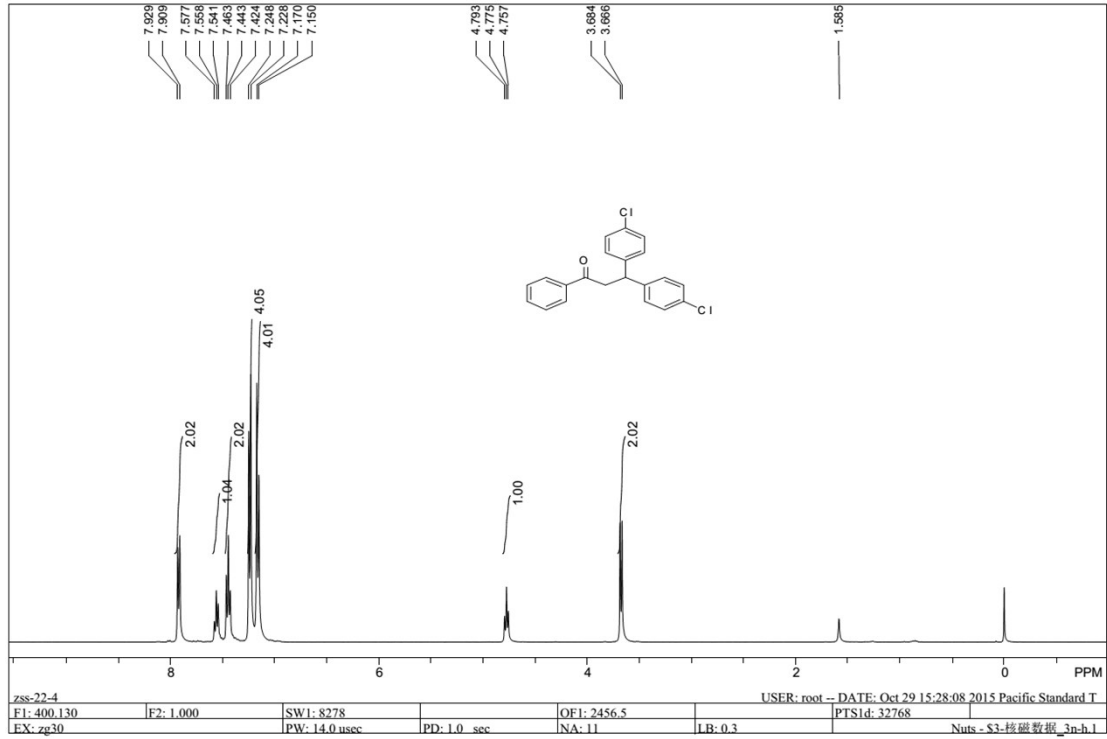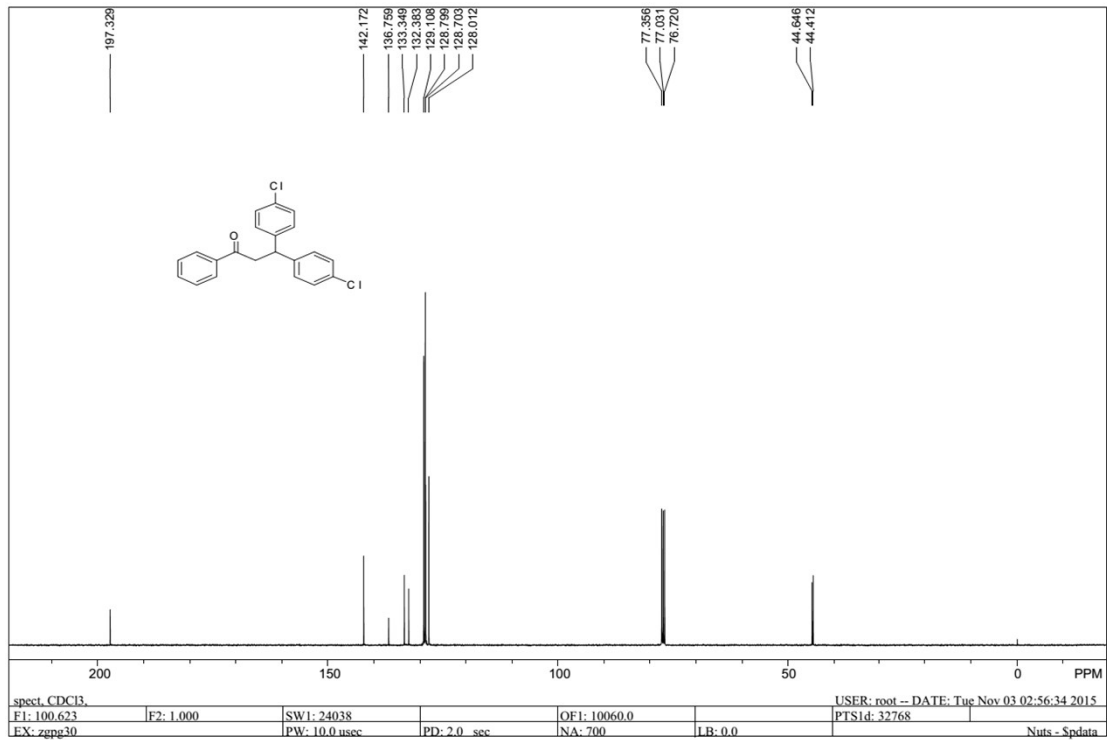

3f

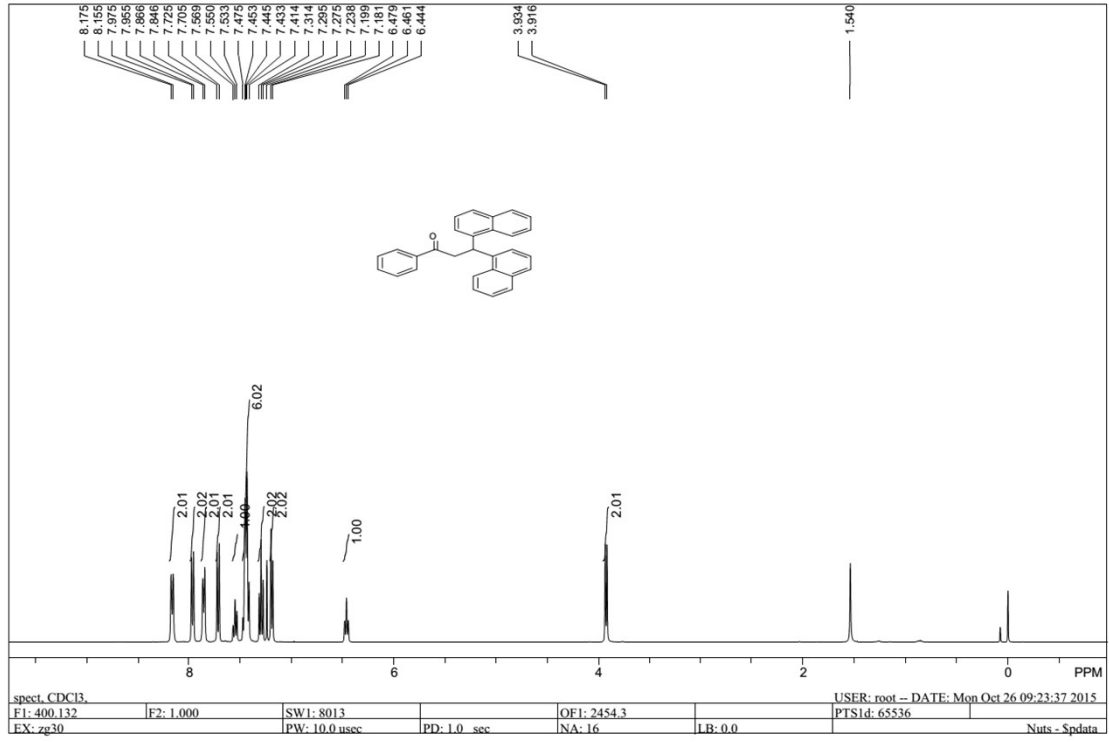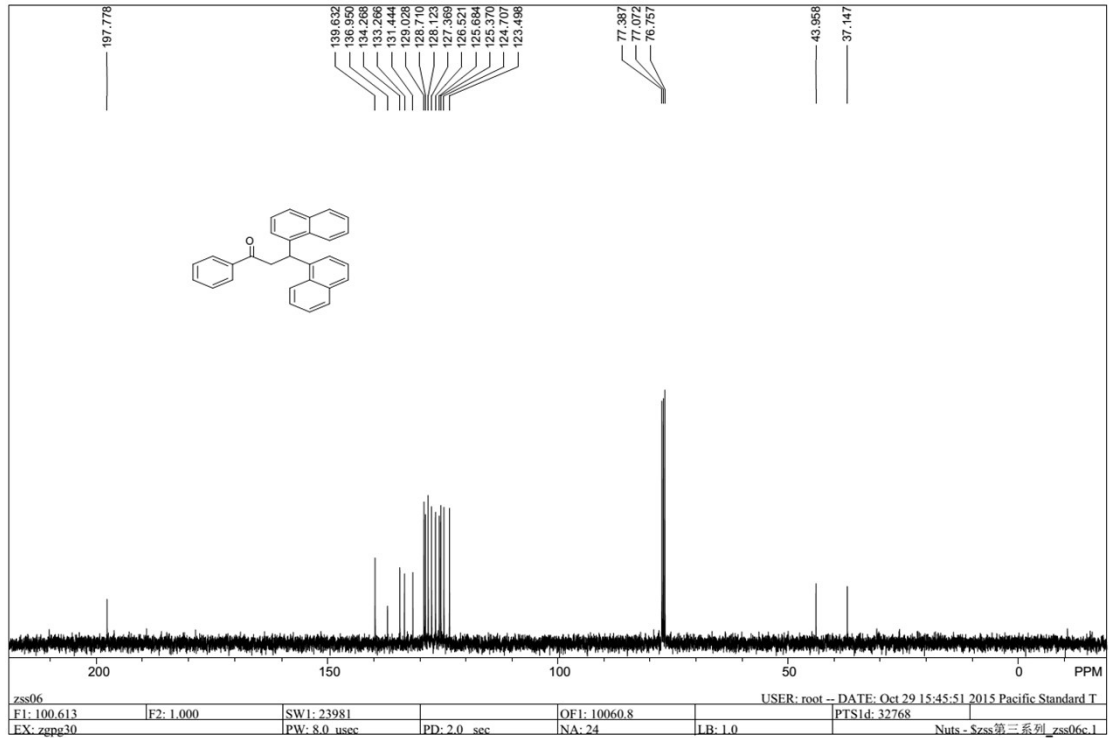

3g

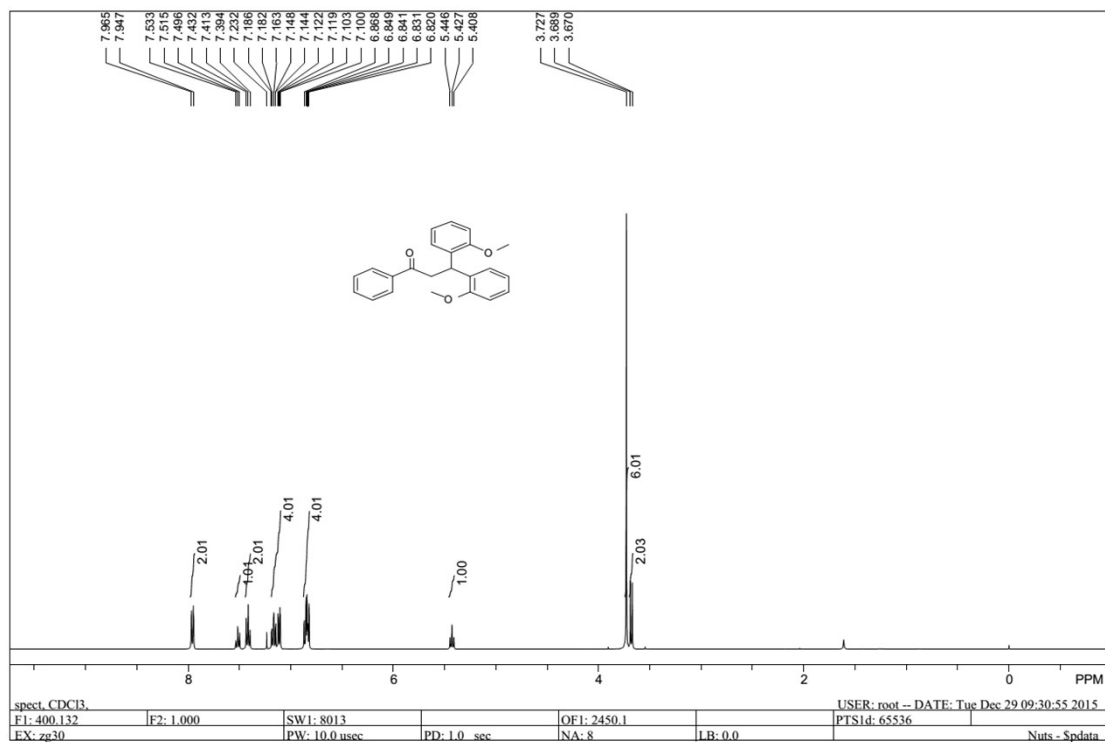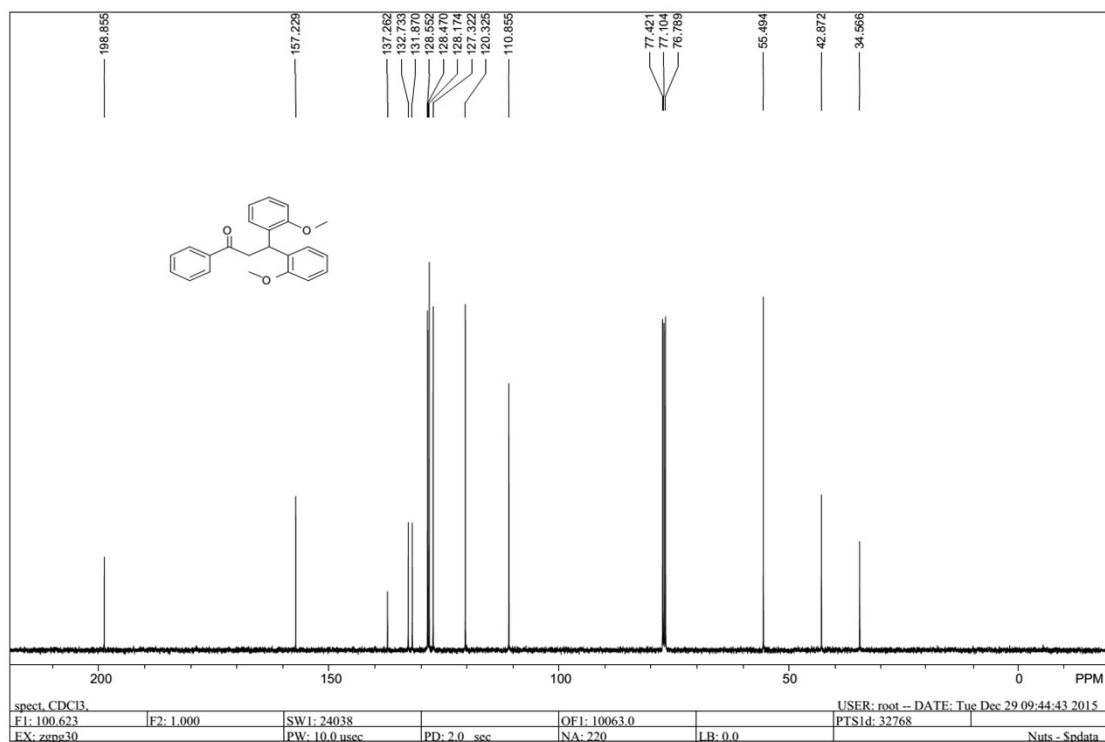



3h

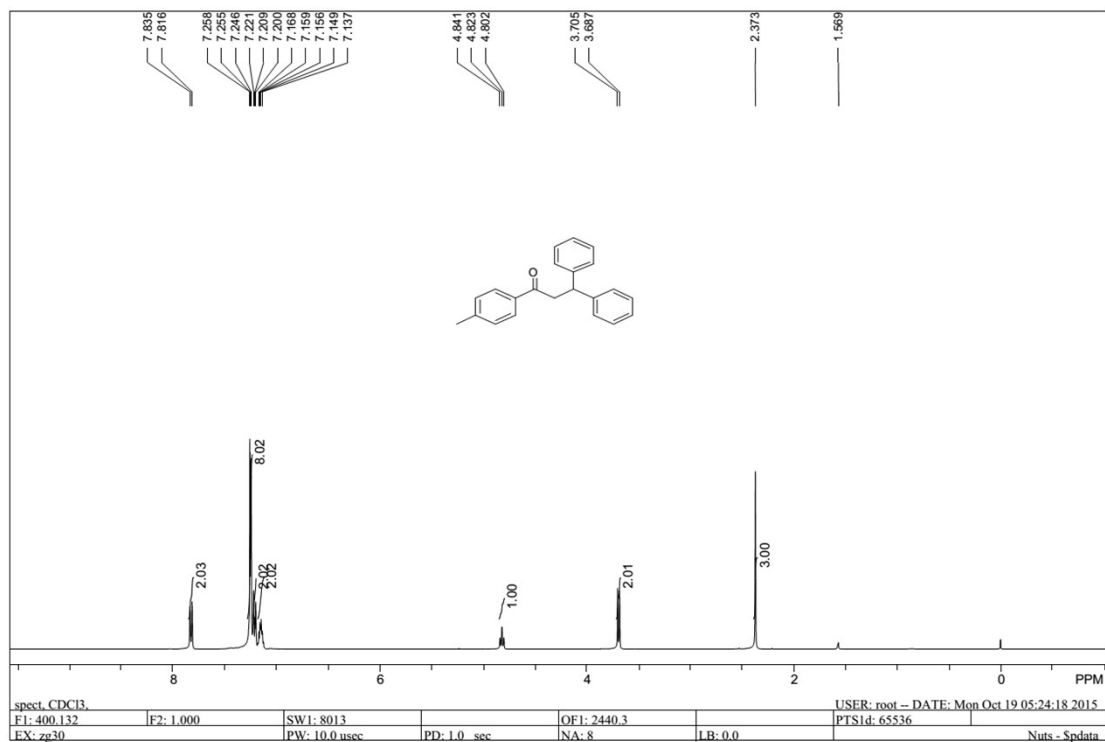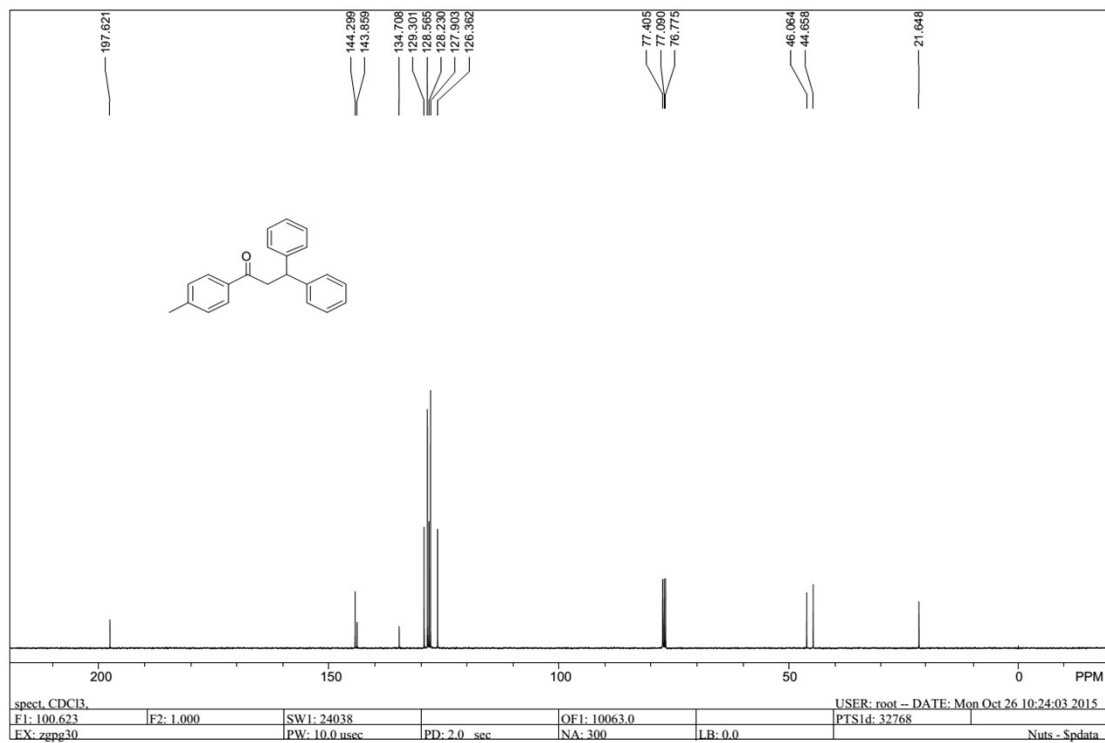

3i

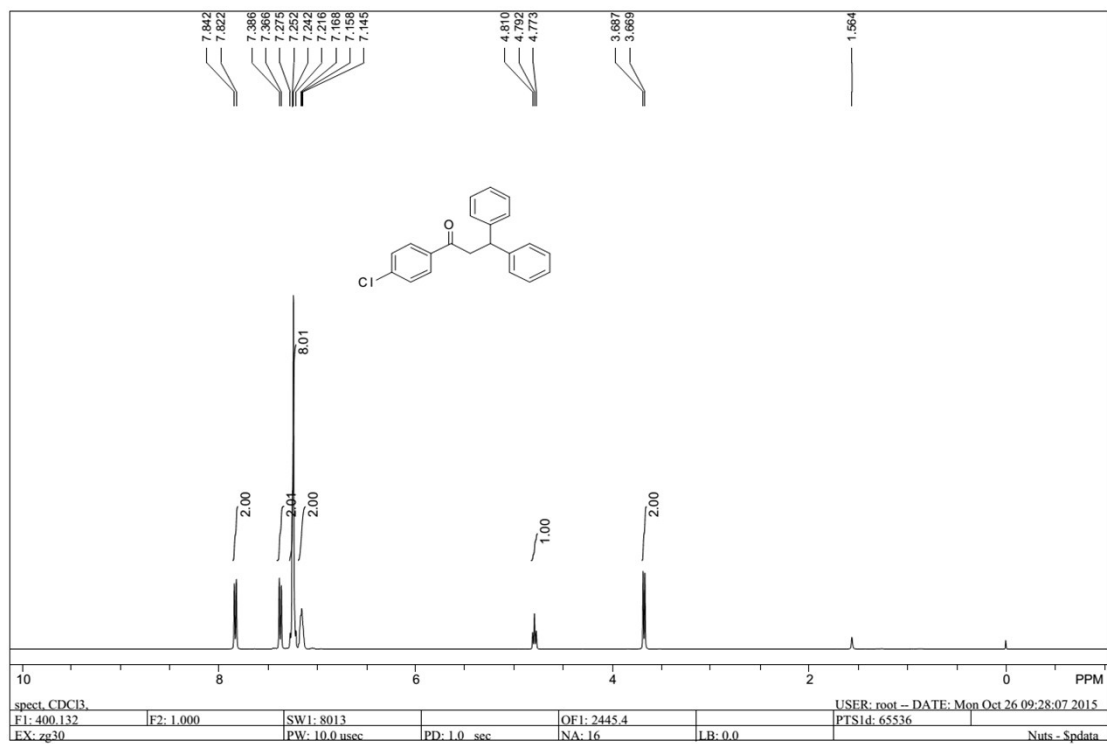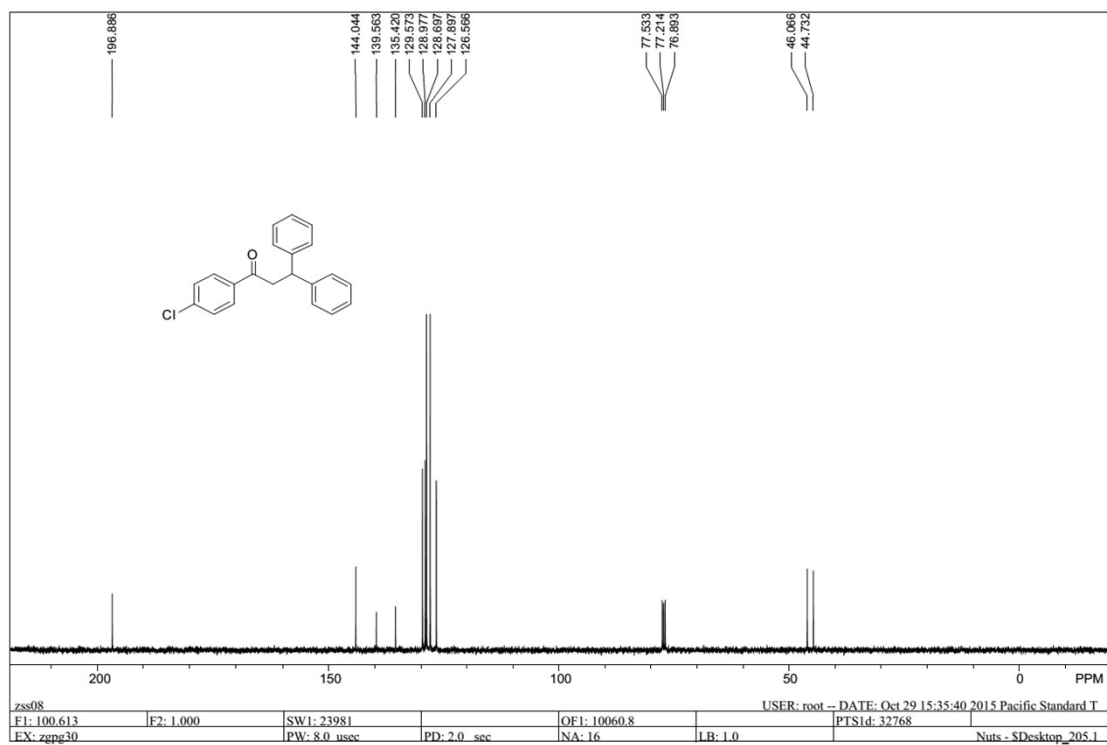

3j

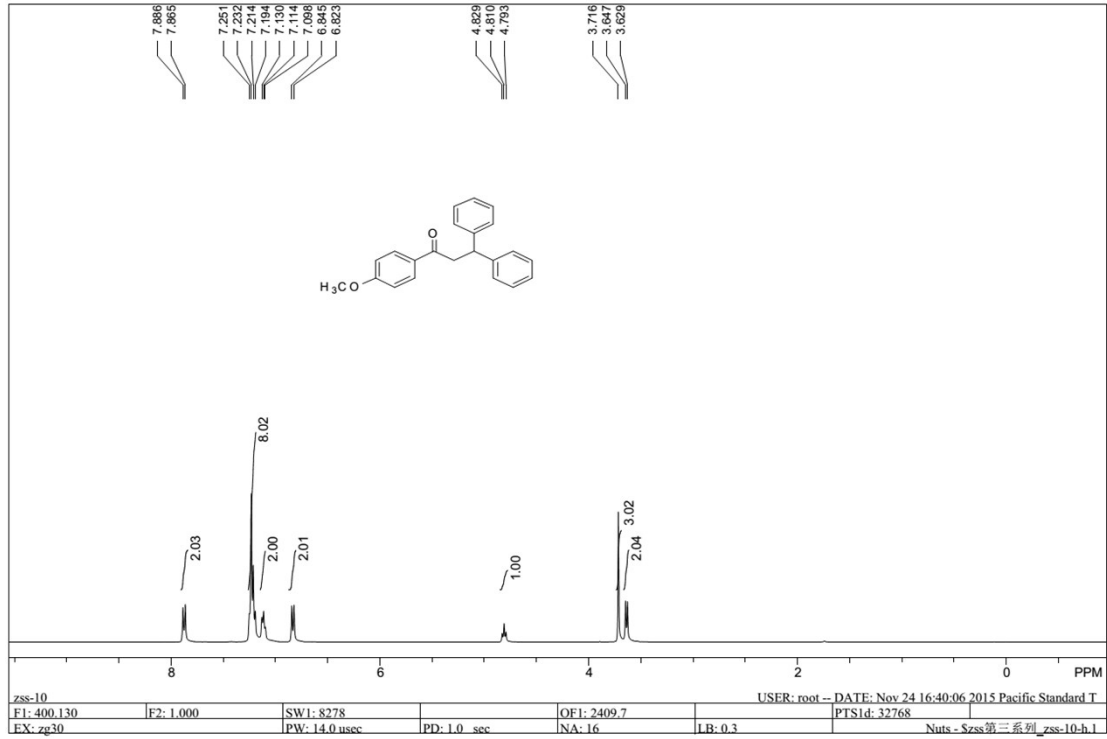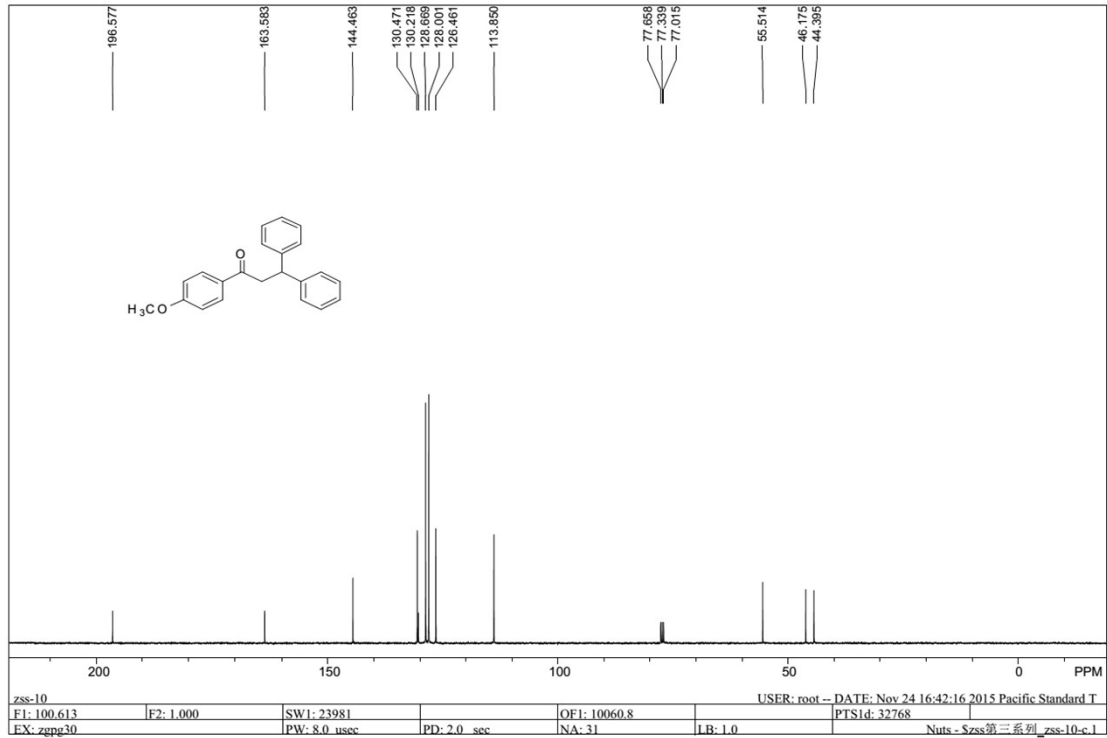

3k

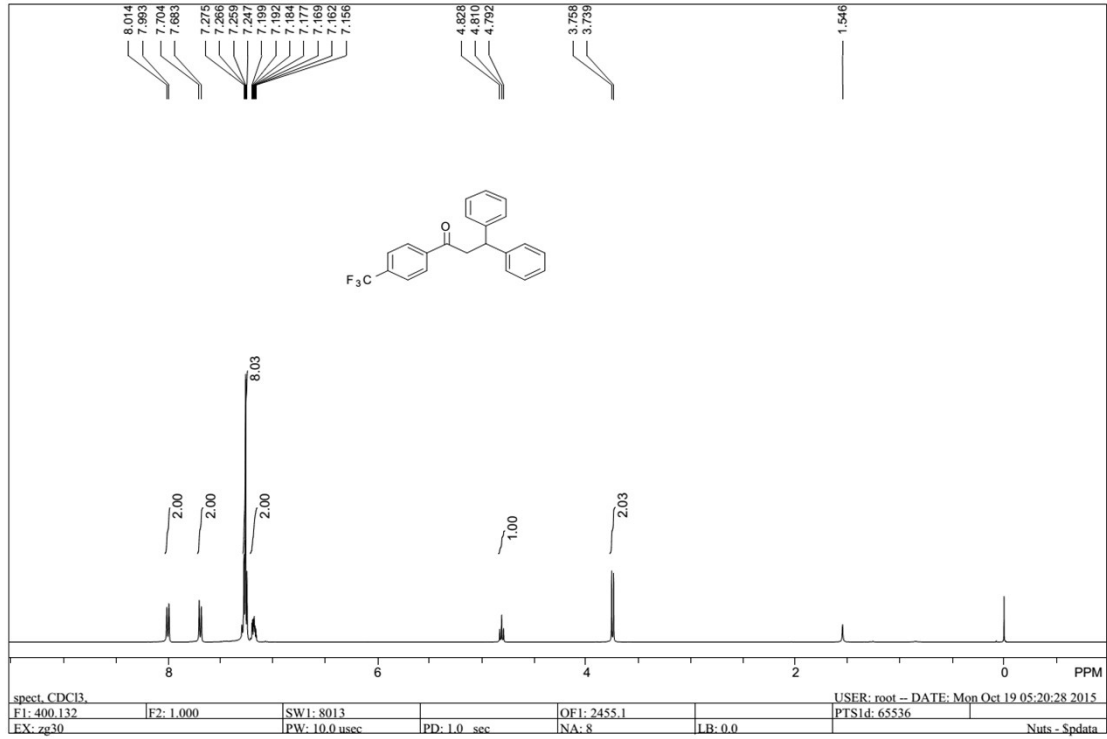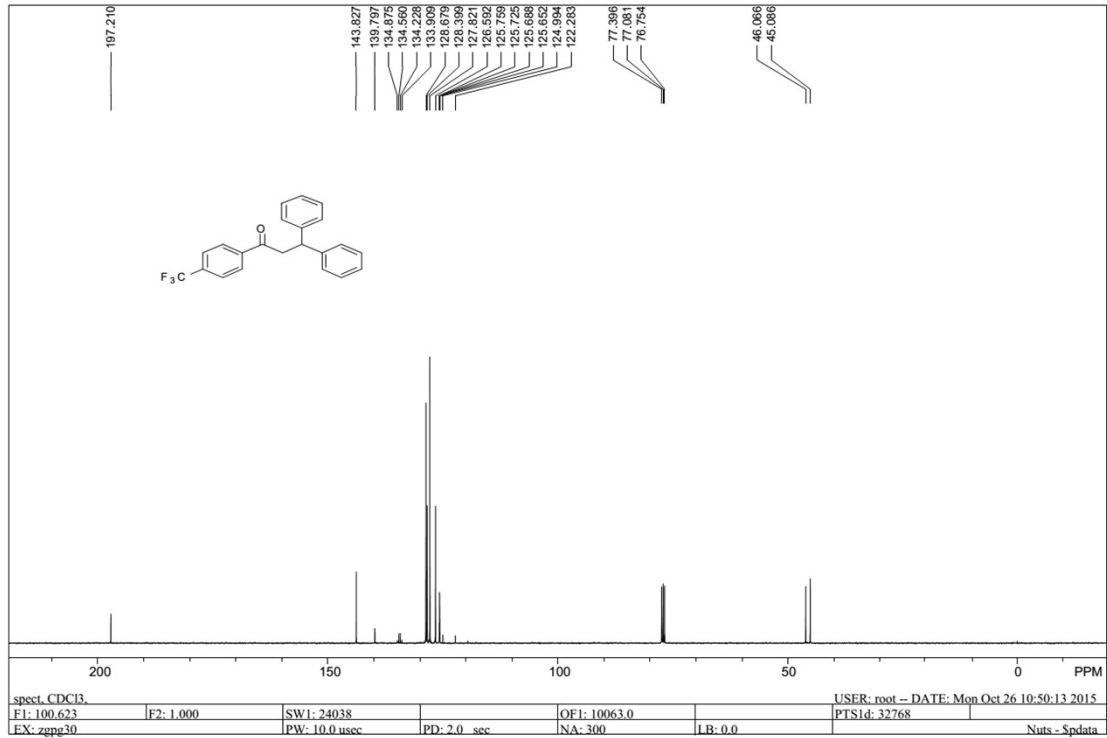

31

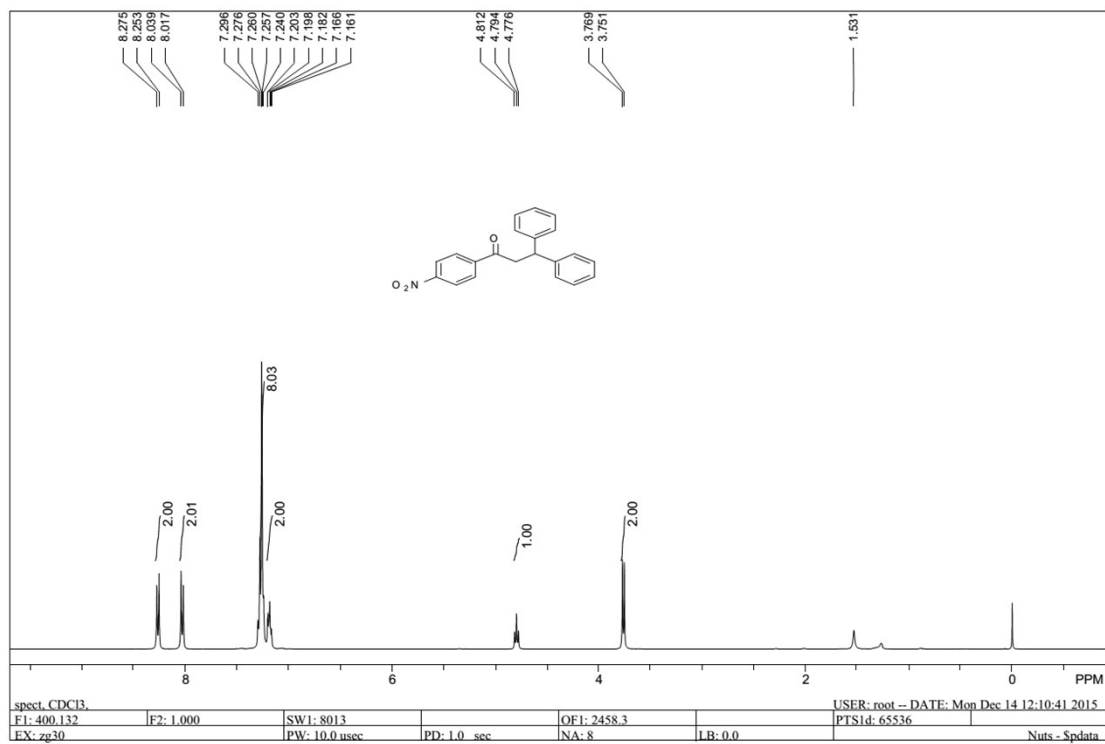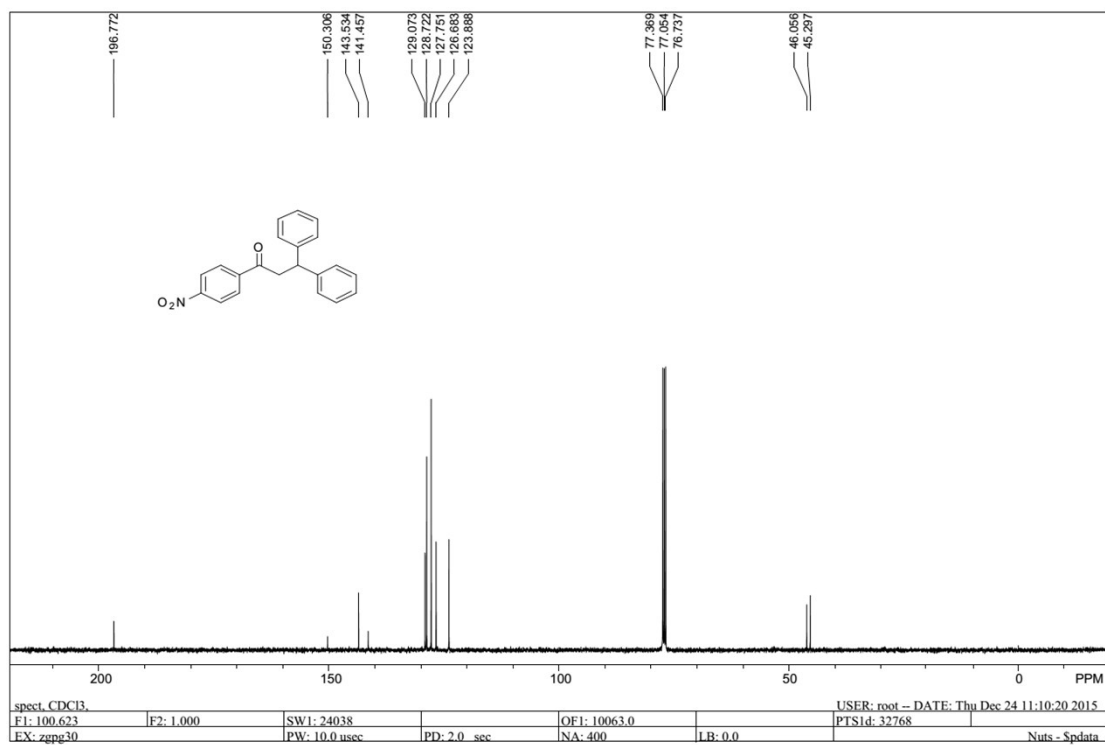

S21

3m

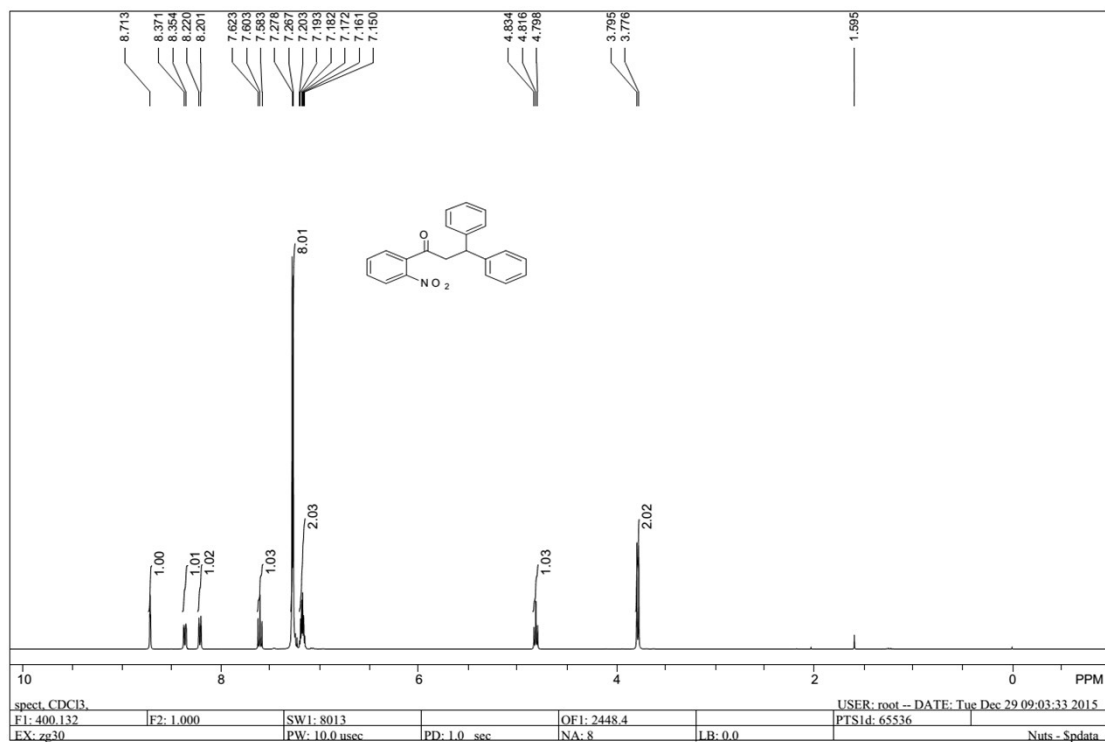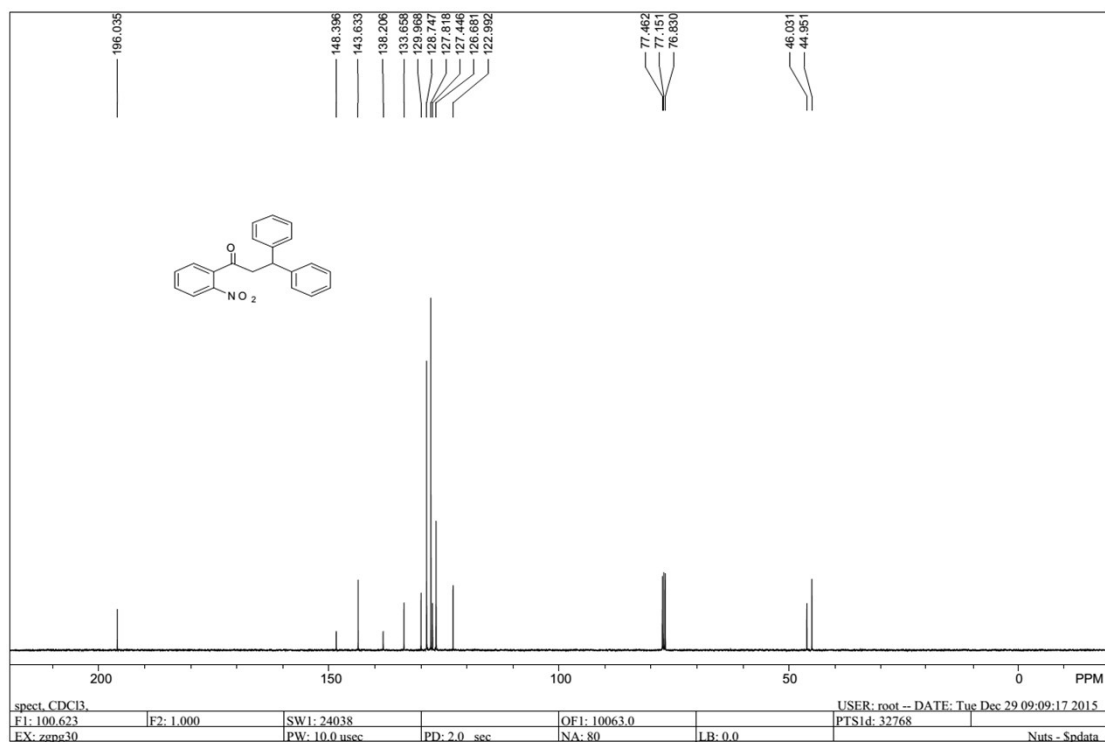

3n

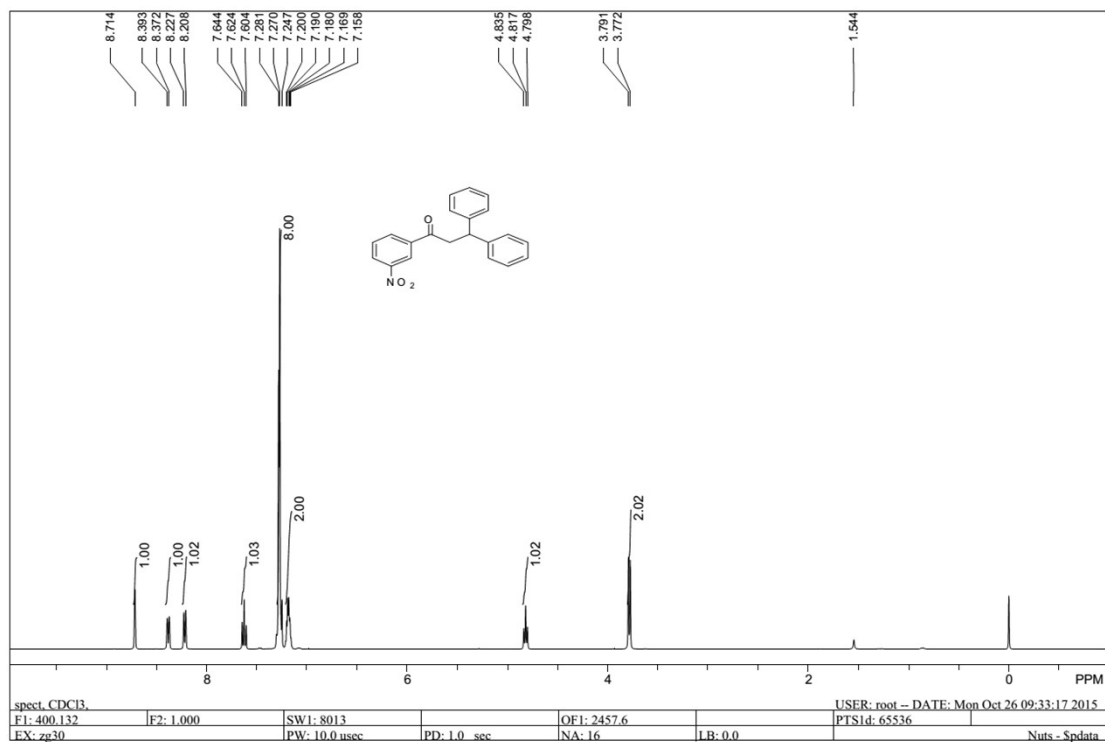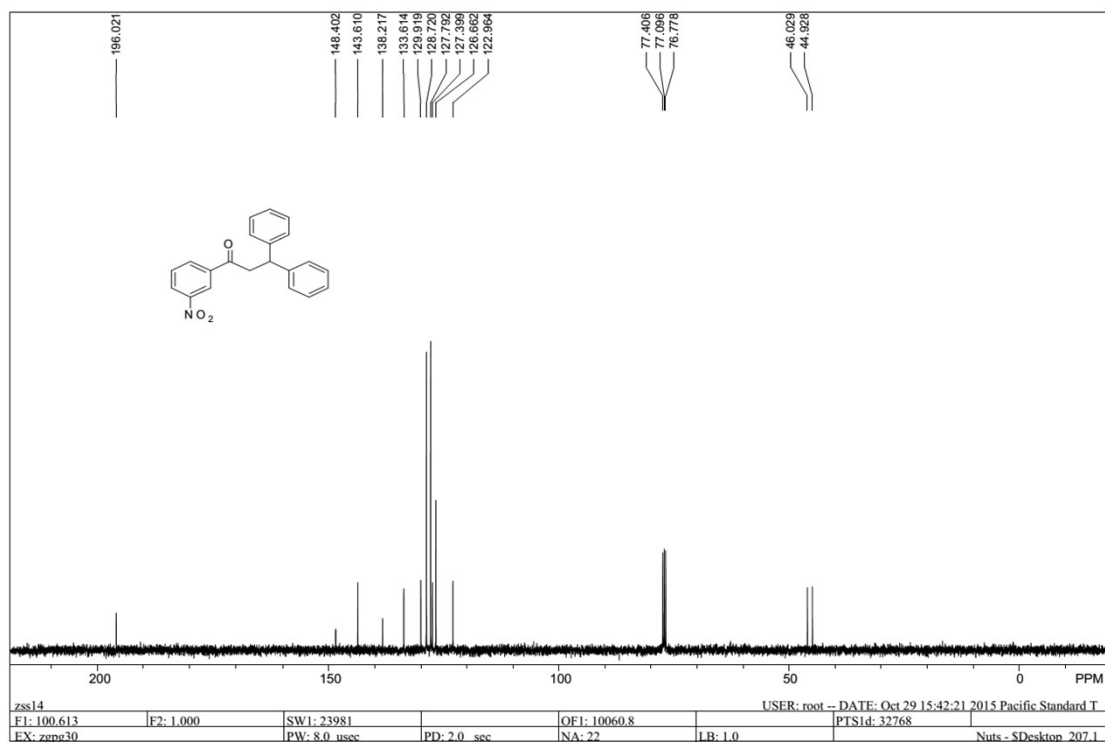

30

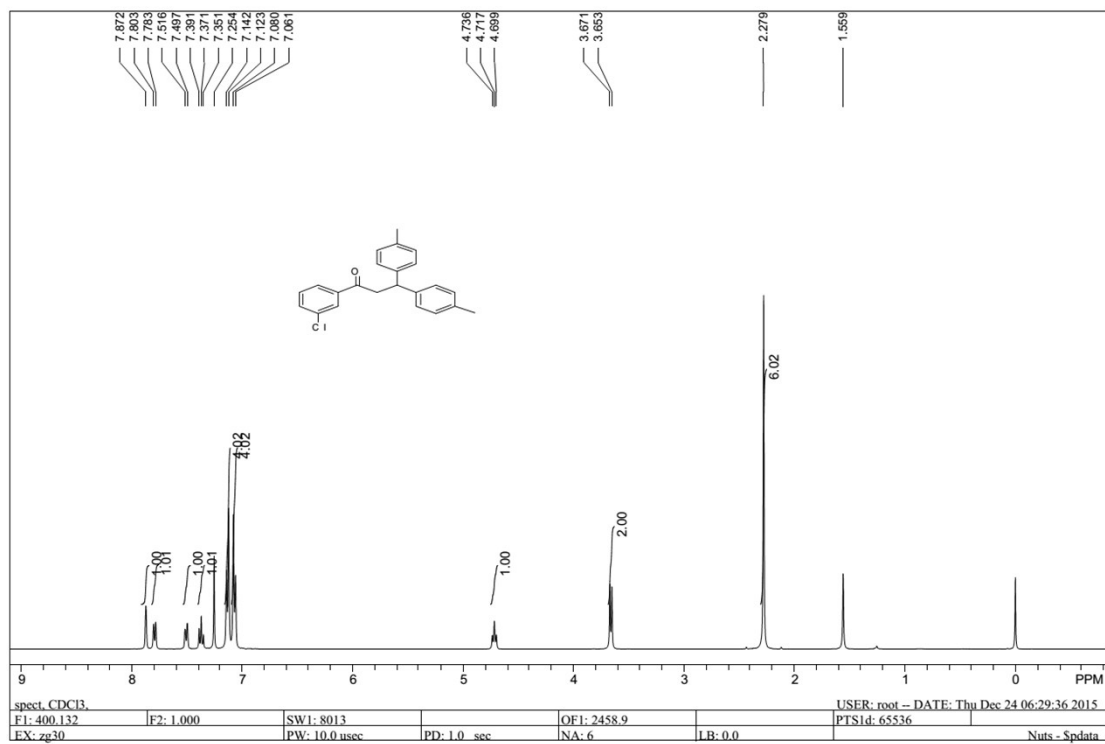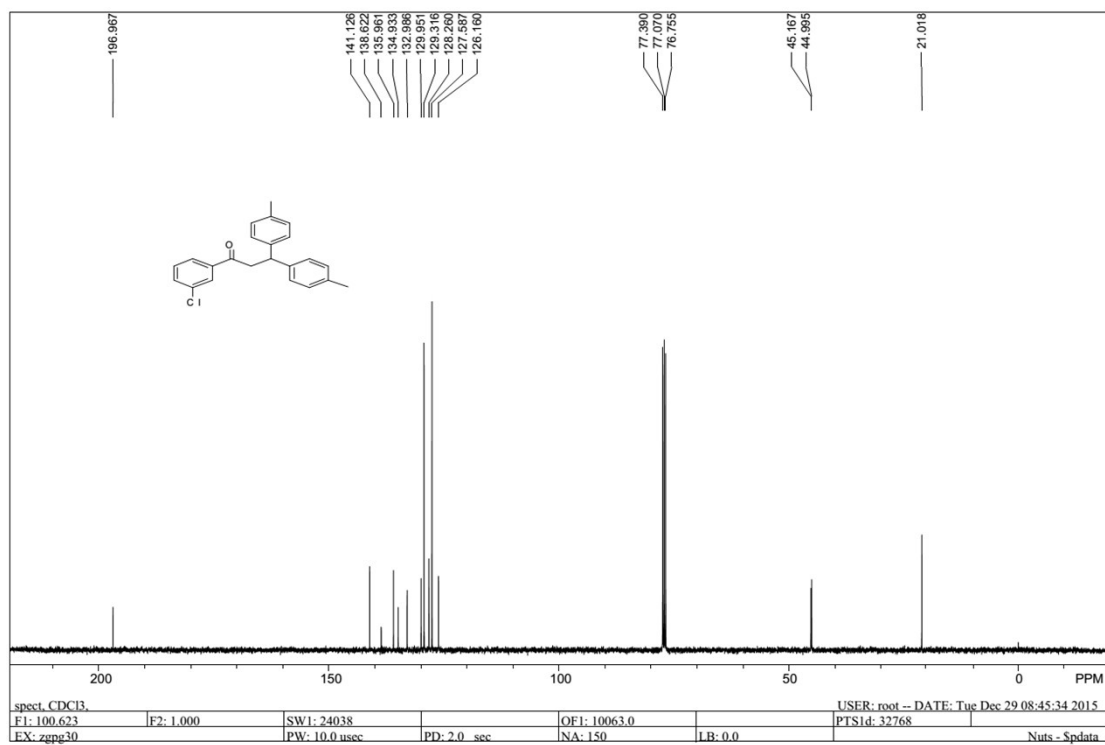

S24



3p

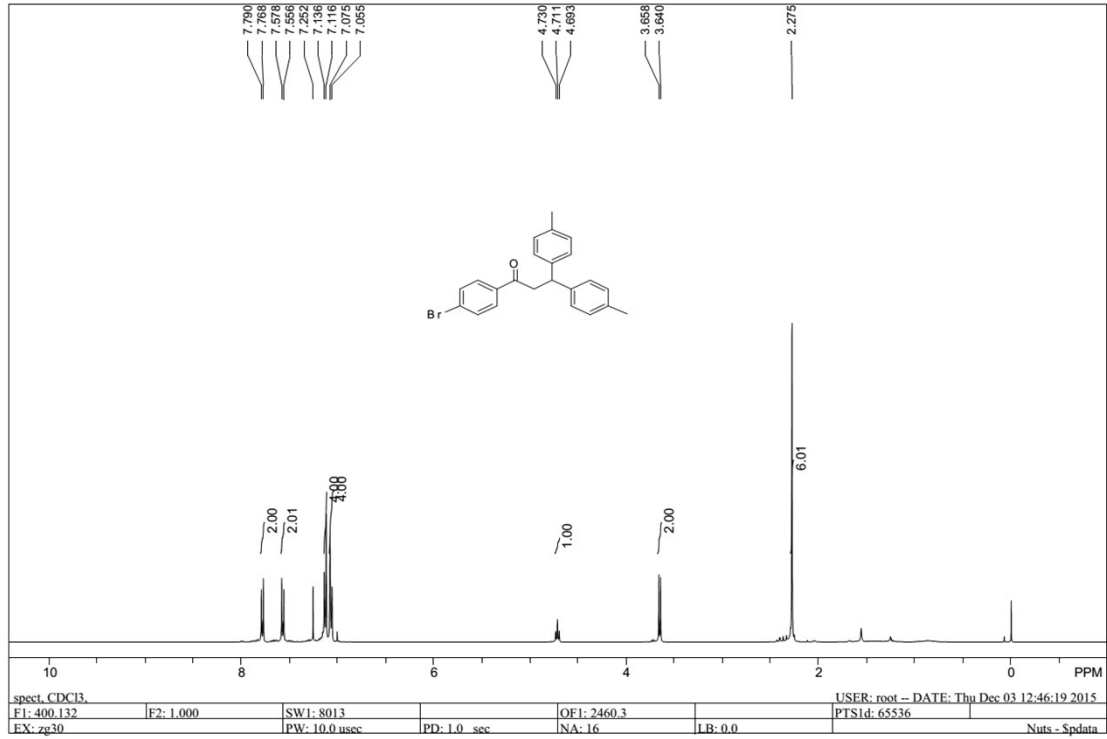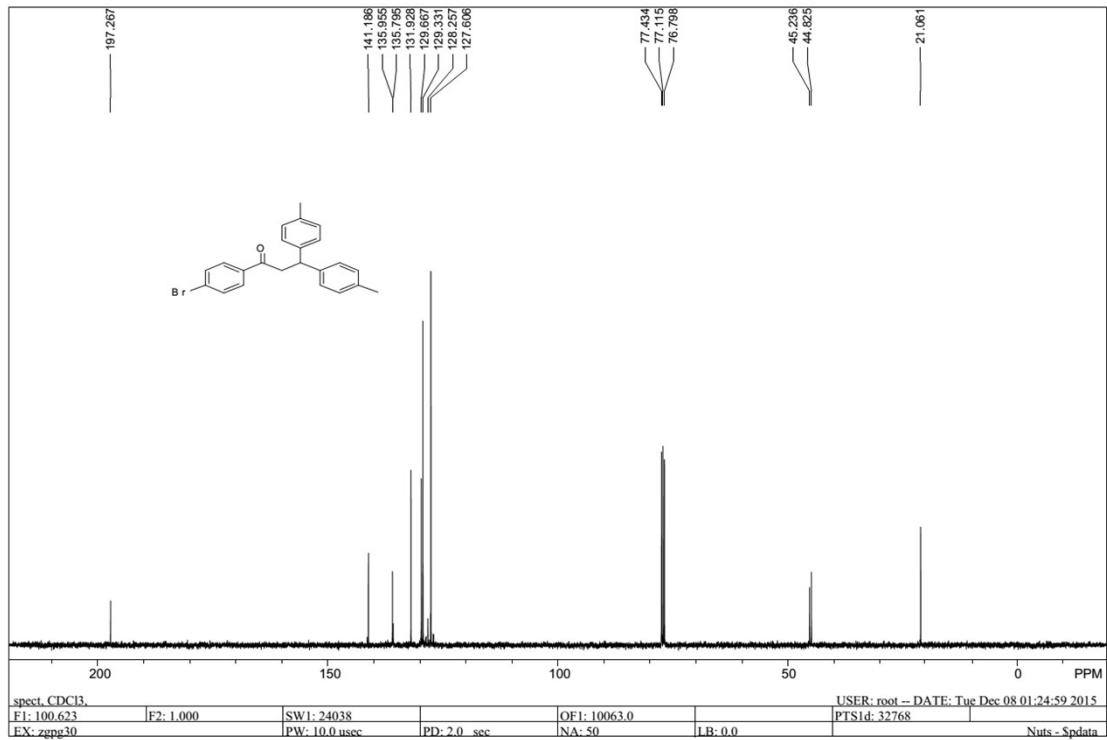

3q

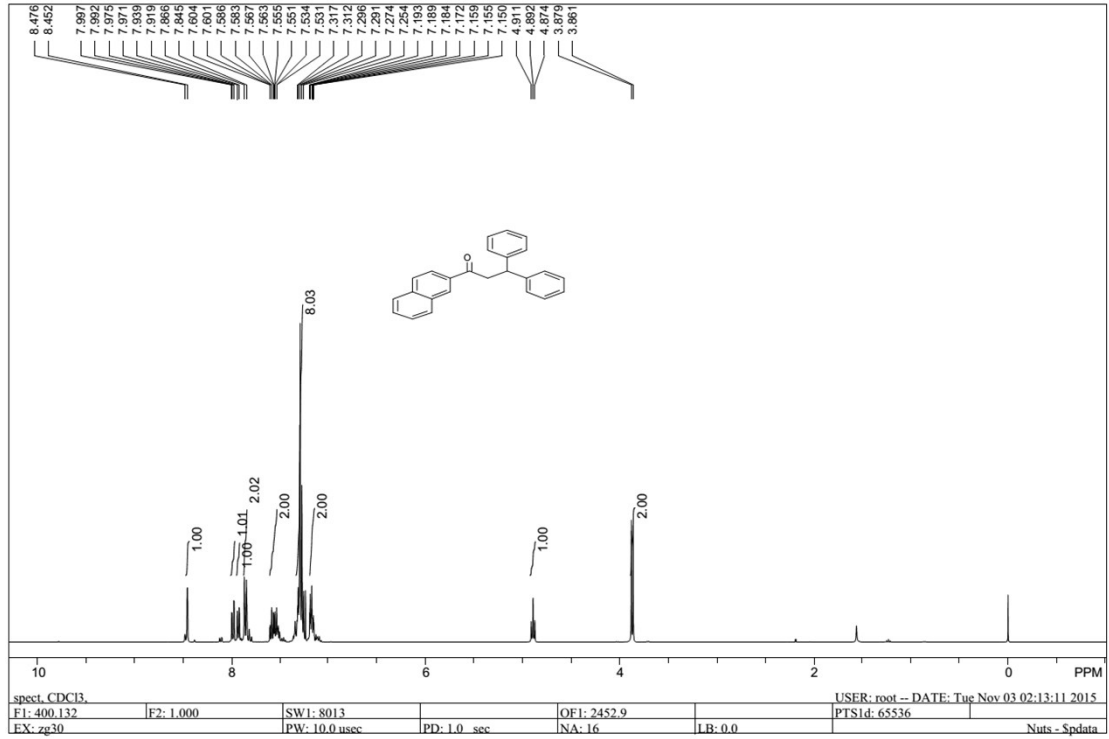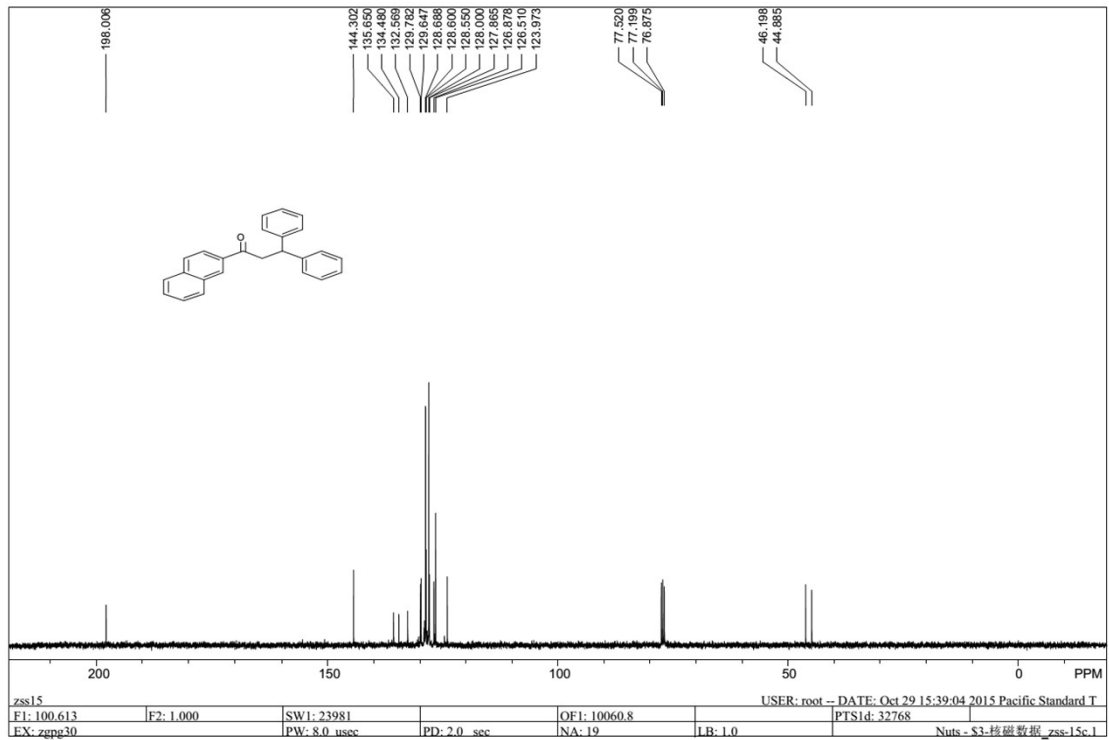

3r

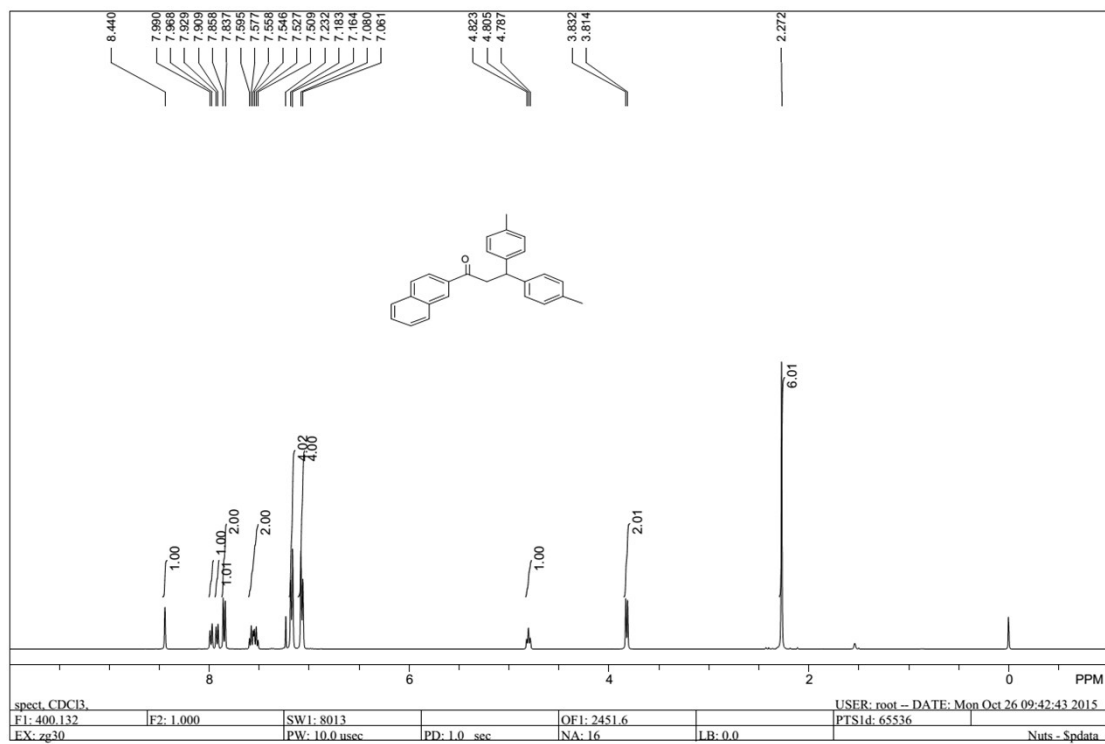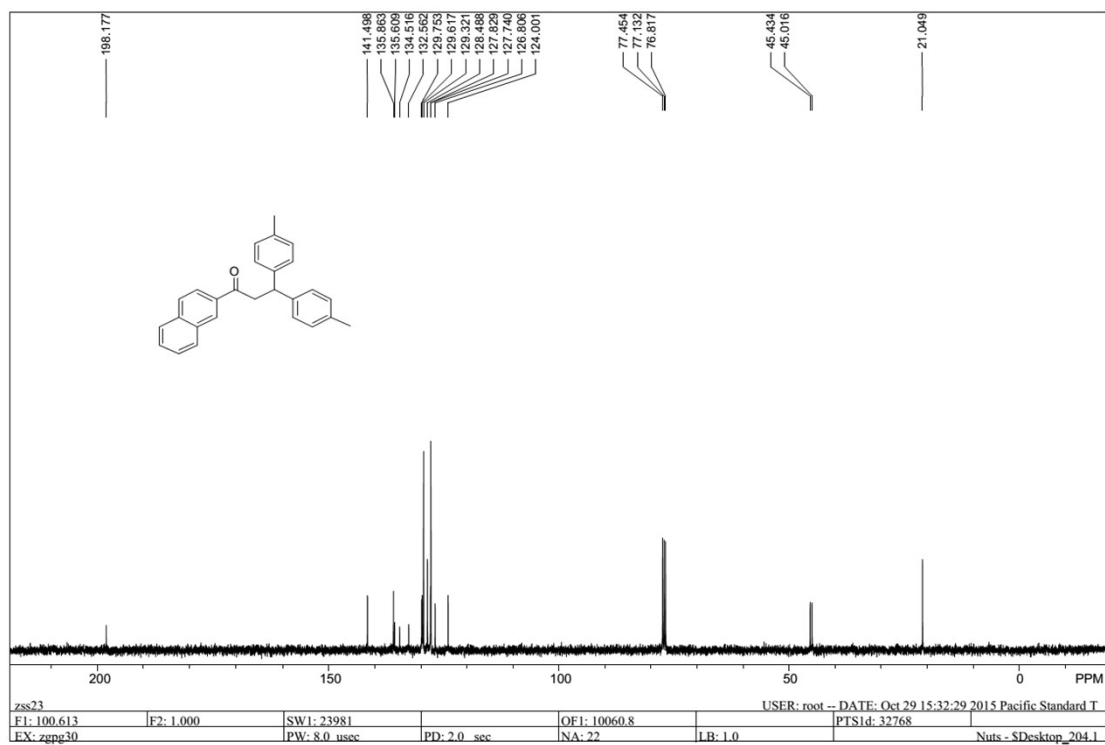

## X-Ray crystal structure of 3a

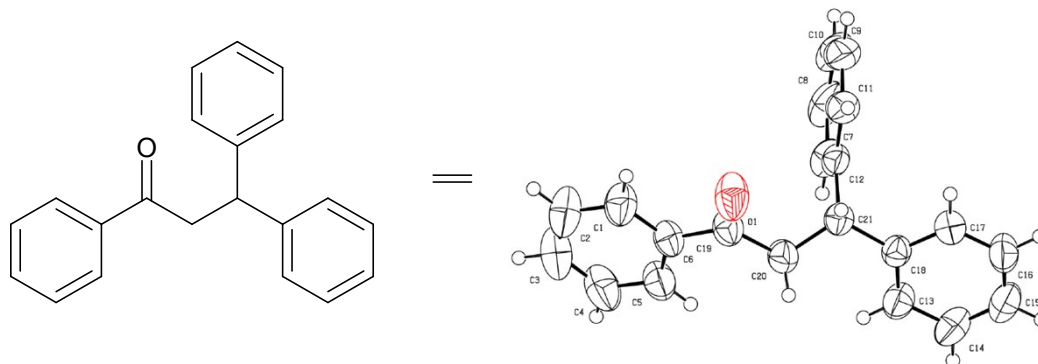

Supplement: c6ob01038e1.pdf [file c6ob01038e1.pdf]
